# Supplementary material for: Effect of Fluoroalkyl-Substituent in Bistolane-Based Photoluminescent Liquid Crystals on Their Physical Behavior
Source: MDPI journal article supplement (doi:10.3390/cryst11040450), 2021-04-20
Supplement: s1 [file s1]

# ***Supplementary Material***

## **Effect of Fluoroalkyl-Substituent in Bistolane-Based Photoluminescent Liquid Crystals on Their Physical Behavior**

Shigeyuki Yamada,<sup>1\*</sup> Yizhou Wang,<sup>1</sup> Masato Morita,<sup>1</sup> Qingzhi Zhang,<sup>2</sup> David O'Hagan,<sup>2</sup>  
Masakazu Nagata,<sup>3</sup> Tomohiro Agou,<sup>3</sup> Hiroki Fukumoto,<sup>3</sup> Toshio Kubota,<sup>3</sup> Mitsuo Hara <sup>4</sup>  
and Tsutomu Konno <sup>1</sup>

<sup>1</sup> Faculty of Molecular Chemistry and Engineering, Kyoto Institute of Technology, Matsugasaki, Sakyo-ku, Kyoto 606-8585, Japan.

<sup>2</sup> School of Chemistry, University of St. Andrews, North Haugh, St. Andrews, KY 15 5EA, UK.

<sup>3</sup> Department of Quantum Beam Science, Graduate School of Science and Engineering, Ibaraki University, 4-12-1 Naka-narusawa, Hitachi, Ibaraki 316-8511, Japan

<sup>4</sup> Graduate School of Engineering, Nagoya University, Furo-cho, Chikusa-ku, Nagoya 464-8603, Japan

\* Correspondence: [syamada@kit.ac.jp](mailto:syamada@kit.ac.jp); +81-75-724-7517

### **Table of Contents**

|                                               |      |
|-----------------------------------------------|------|
| 1. NMR Spectra                                | S-2  |
| 2. Crystallography                            | S-10 |
| 3. Quantum Chemical Calculation               | S-12 |
| 4. Phase Transition Behavior                  |      |
| 4.1. DSC and PXRD                             | S-27 |
| 4.2. POM                                      | S-32 |
| 5. Photophysical Behavior                     |      |
| 5.1. CH <sub>2</sub> Cl <sub>2</sub> Solution | S-33 |
| 5.2. Solvent Effect                           | S-34 |
| 5.3. Crystal                                  | S-37 |

## 1. NMR Spectra

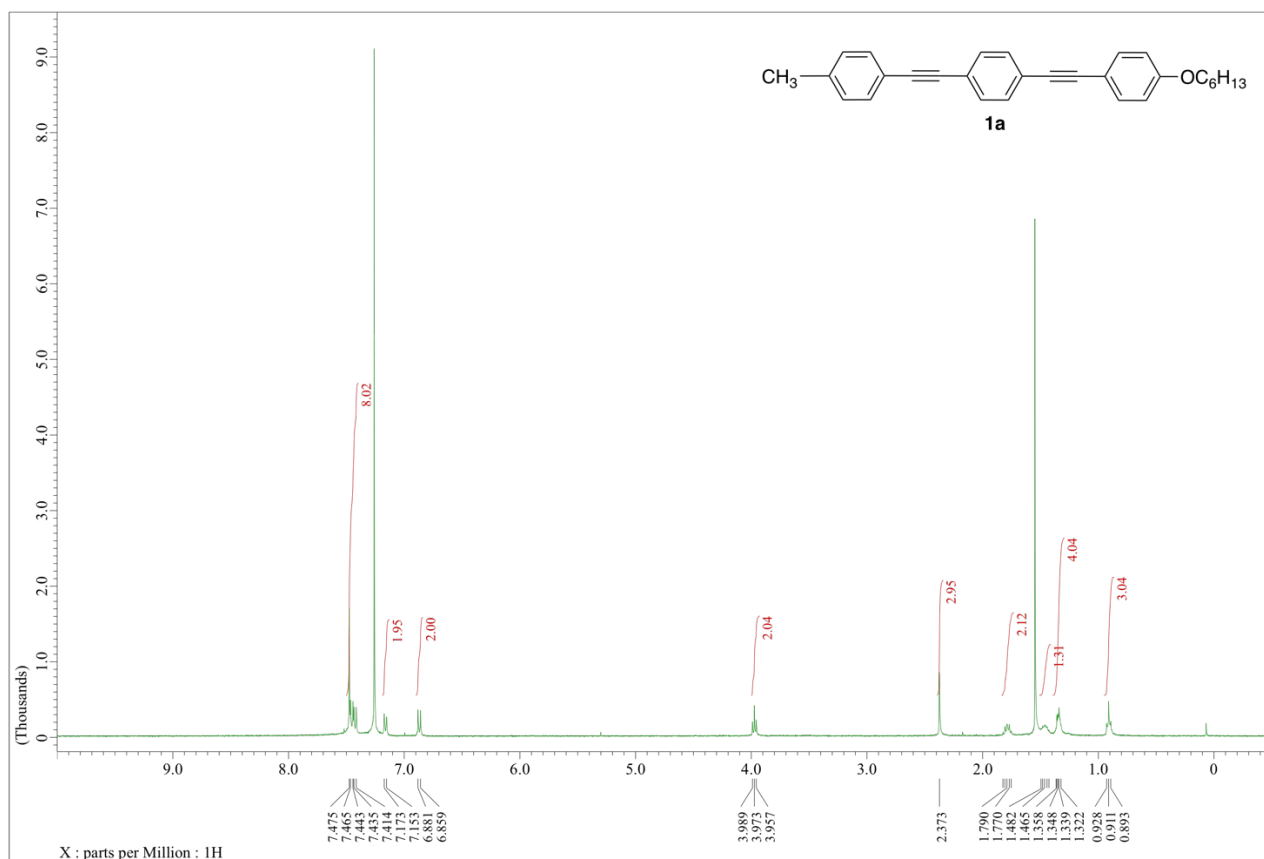

**Figure S1.** <sup>1</sup>H NMR spectrum of **1a** (solvent: CDCl<sub>3</sub>).

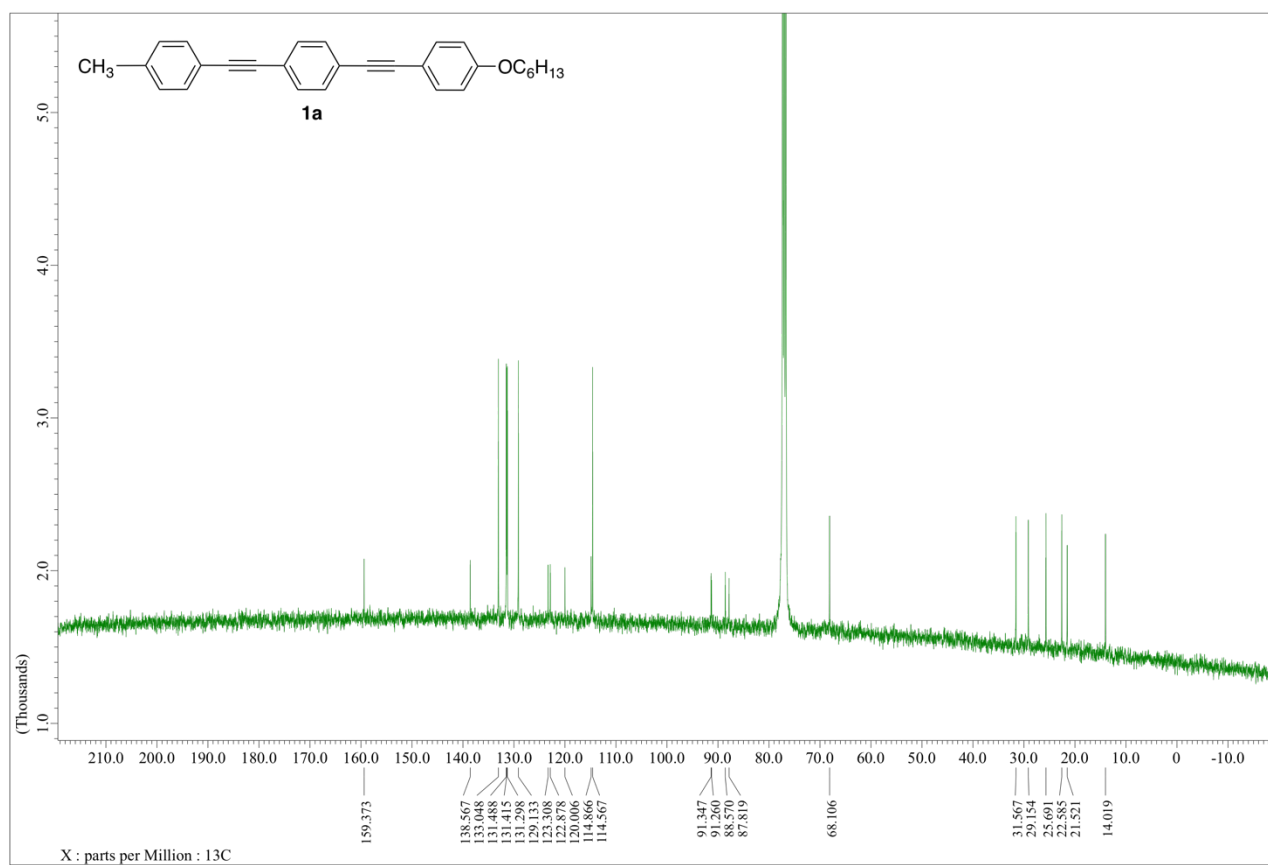

**Figure S2.**  $^{13}\text{C}$  NMR spectrum of **1a** (solvent:  $\text{CDCl}_3$ ).

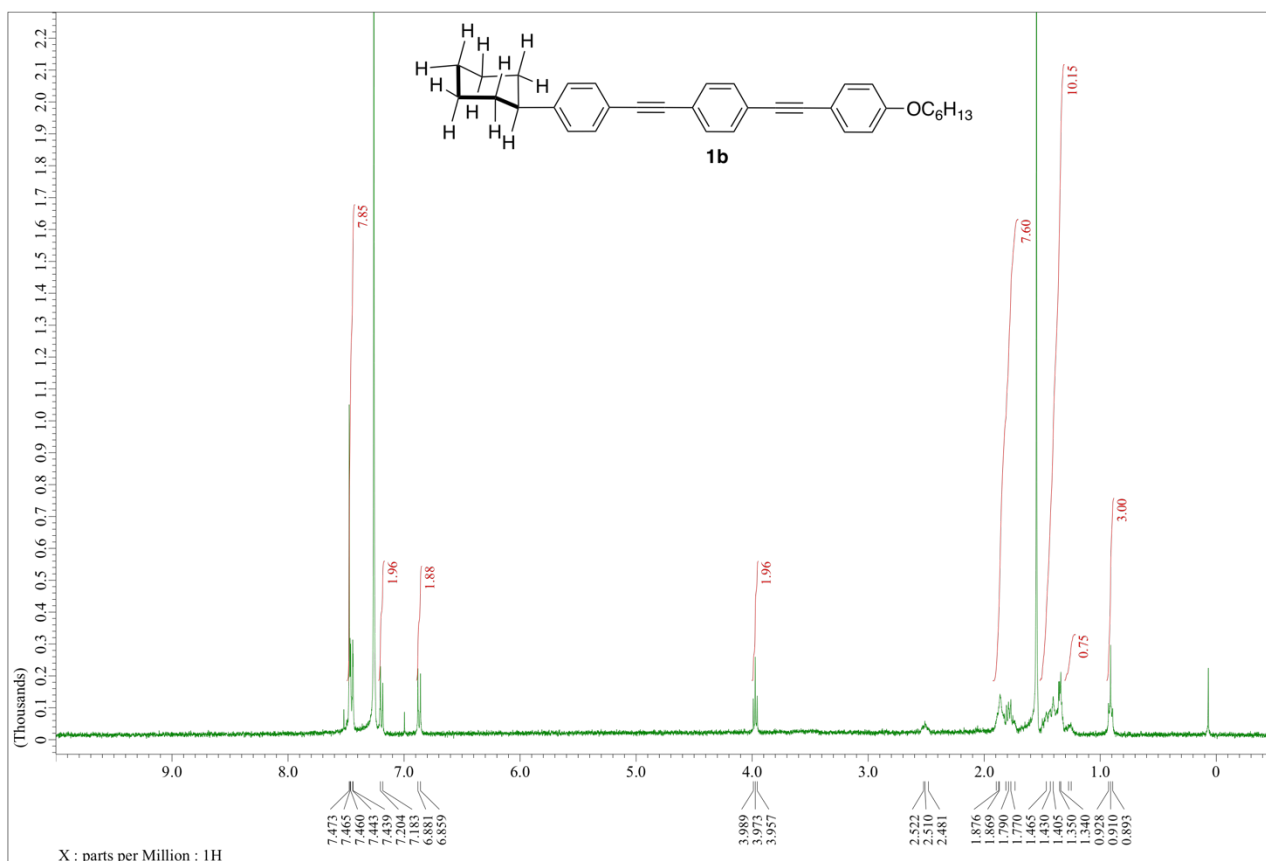

**Figure S3.**  $^1\text{H}$  NMR spectrum of **1b** (solvent:  $\text{CDCl}_3$ ).

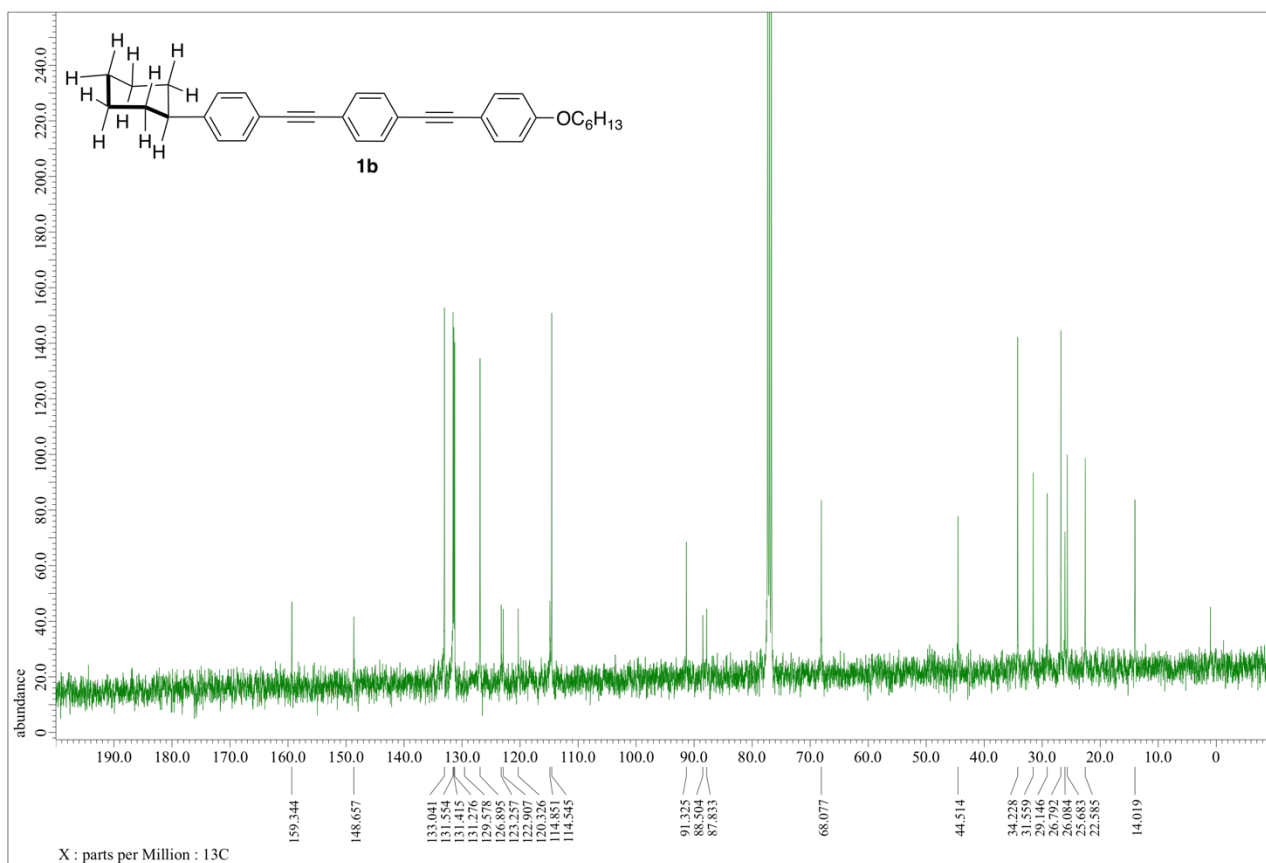

**Figure S4.**  $^{13}\text{C}$  NMR spectrum of **1b** (solvent:  $\text{CDCl}_3$ ).

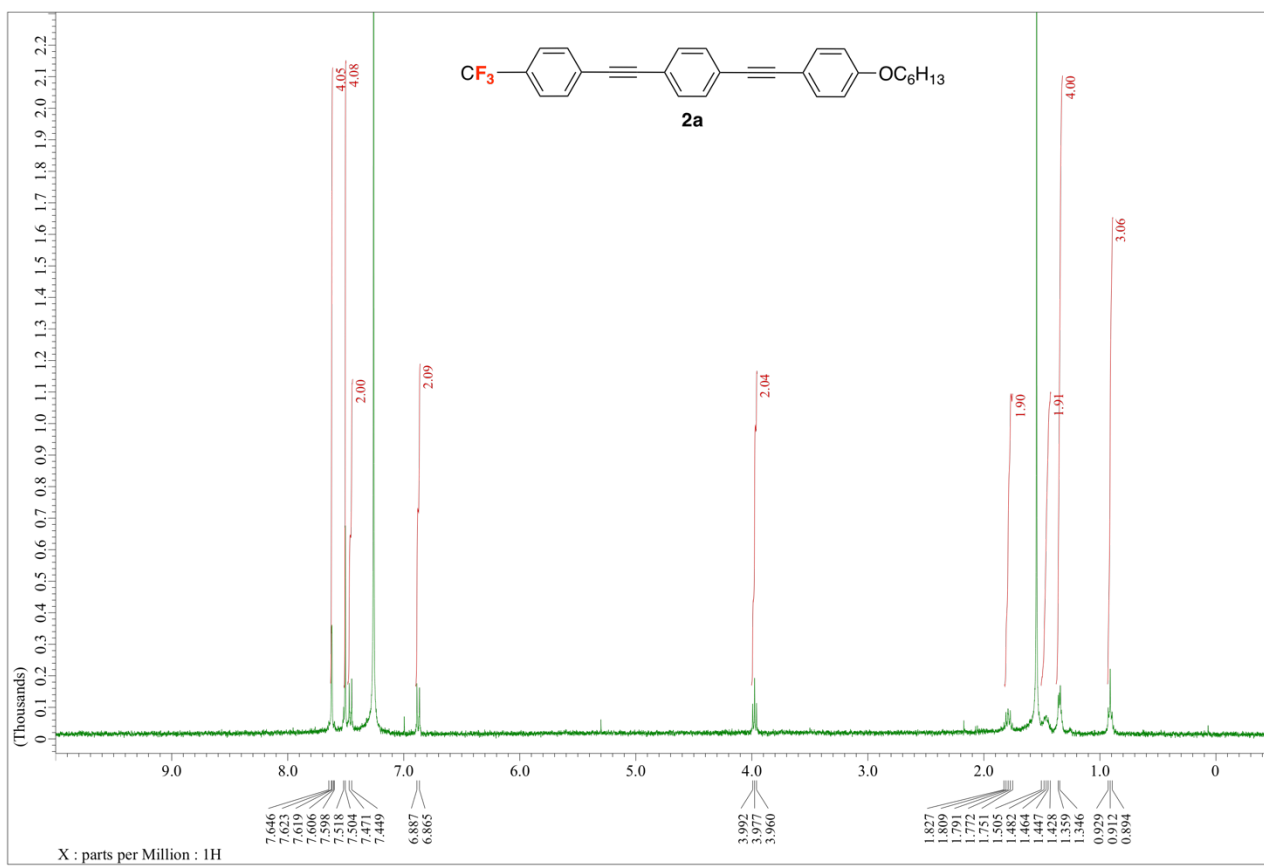

**Figure S5.**  $^1\text{H}$  NMR spectrum of **2a** (solvent:  $\text{CDCl}_3$ ).

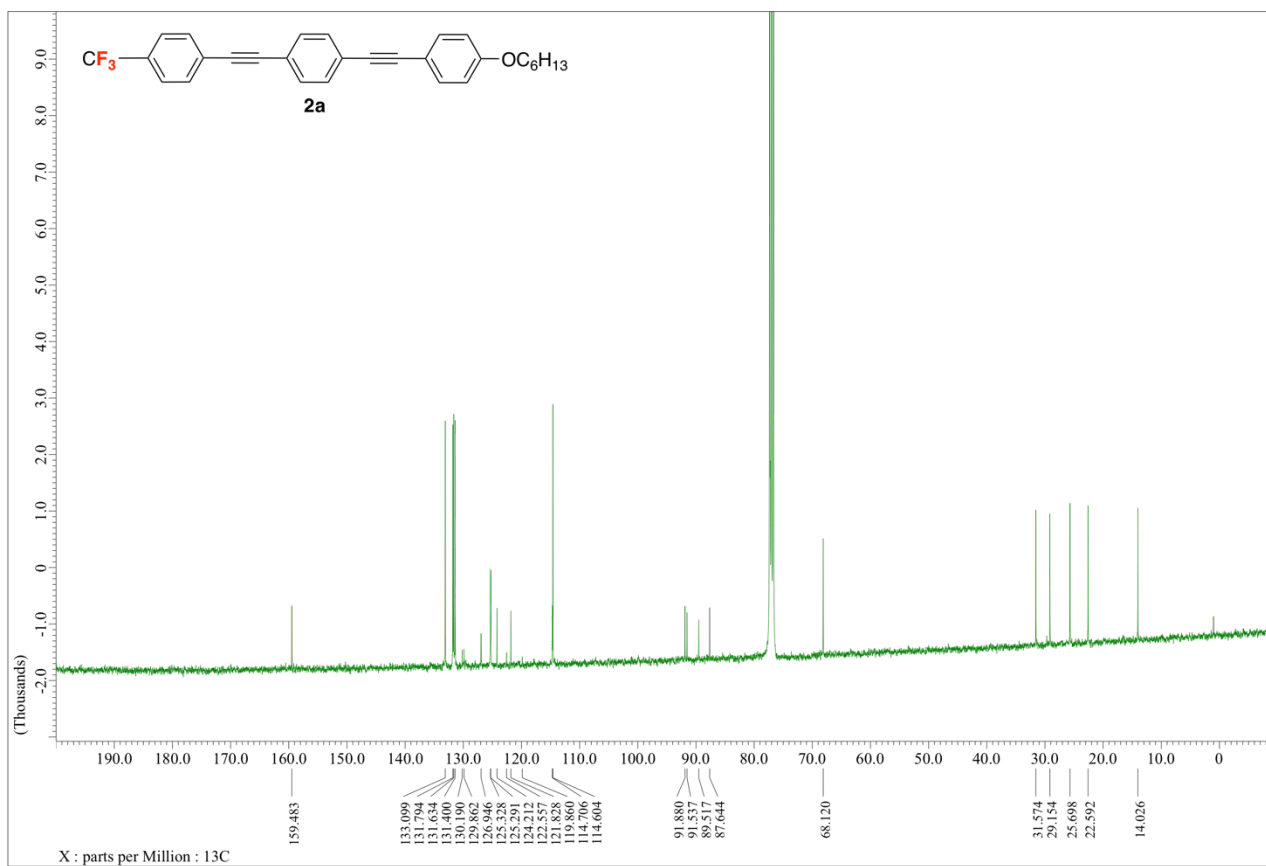



**Figure S6.**  $^{13}\text{C}$  NMR spectrum of **2a** (solvent:  $\text{CDCl}_3$ ).

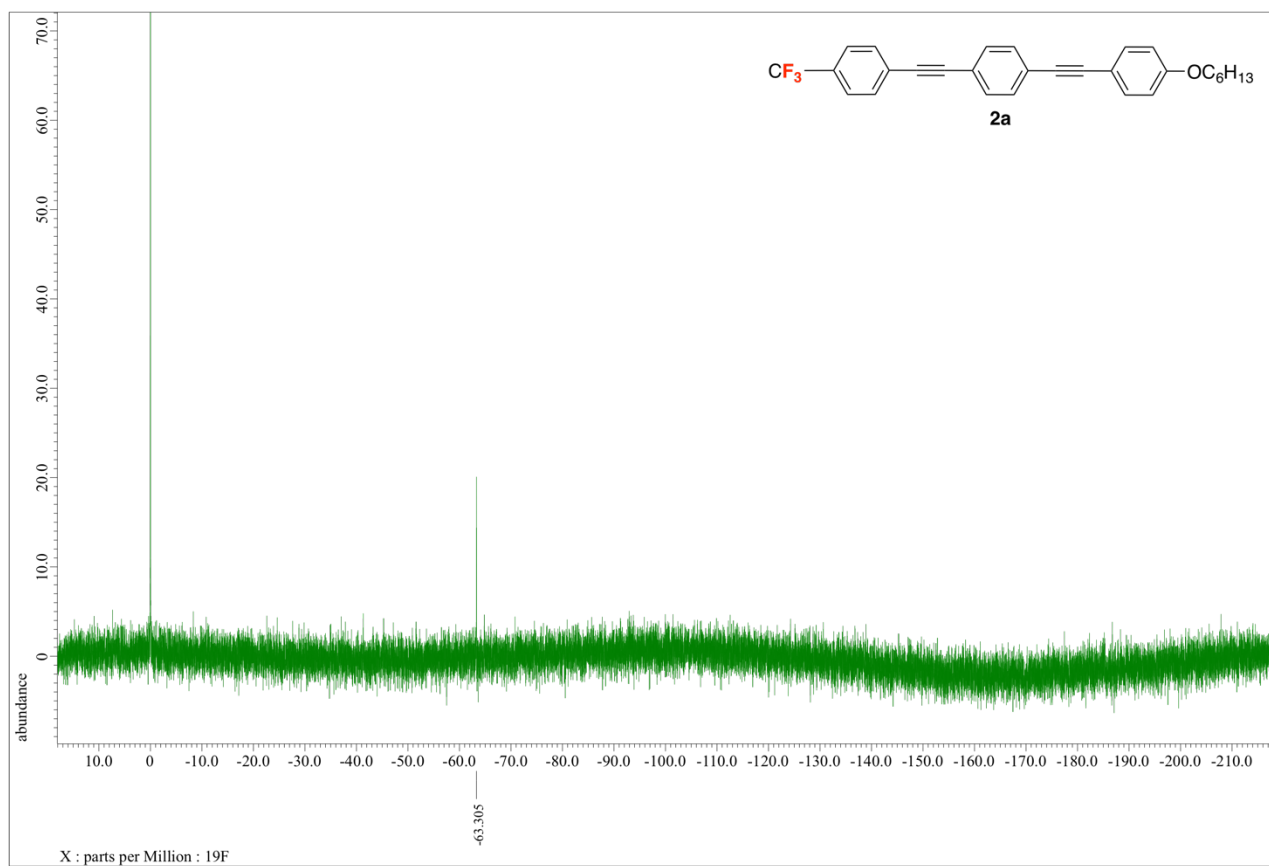

**Figure S7.**  $^{19}\text{F}$  NMR spectrum of **2a** (solvent:  $\text{CDCl}_3$ ; Internal reference:  $\text{CFCl}_3$ ).

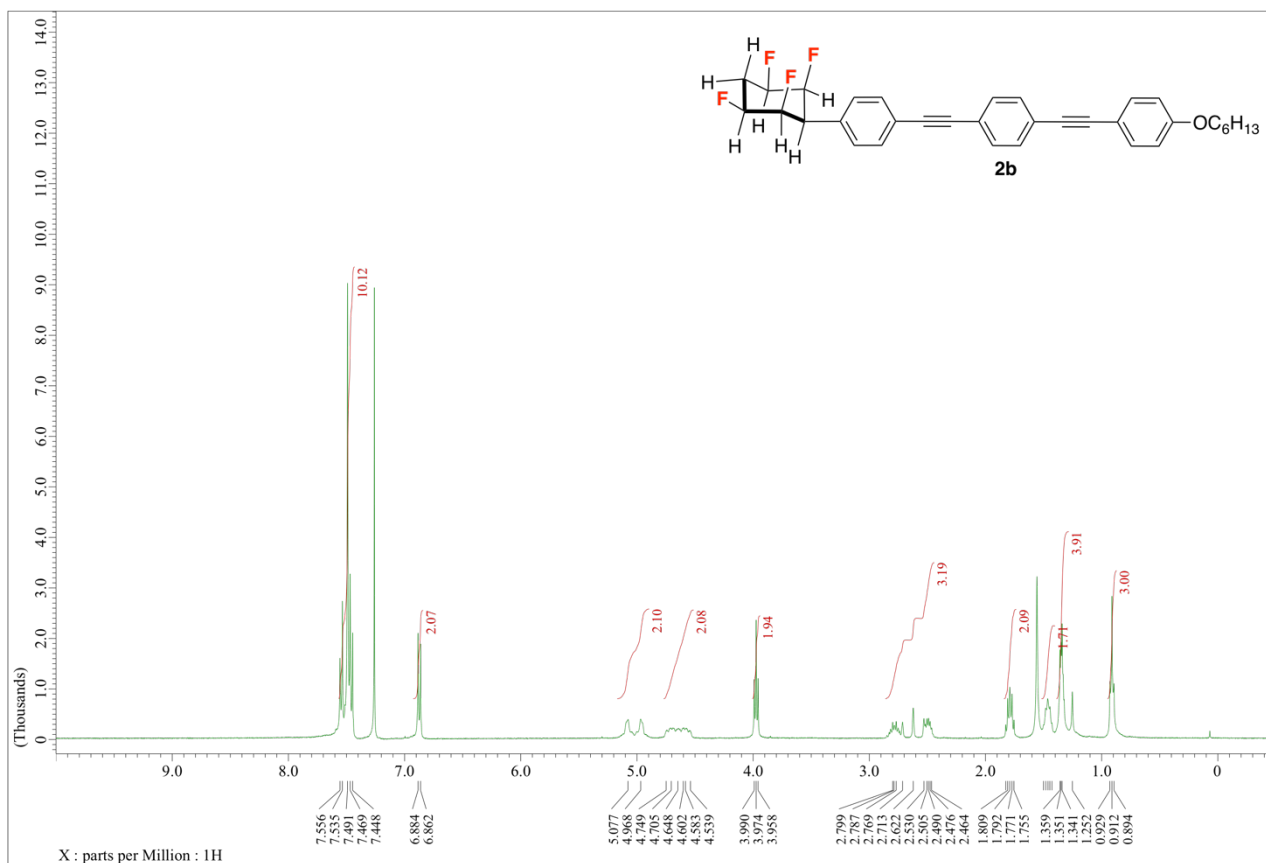

**Figure S8.** <sup>1</sup>H NMR spectrum of **2b** (solvent: CDCl<sub>3</sub>).

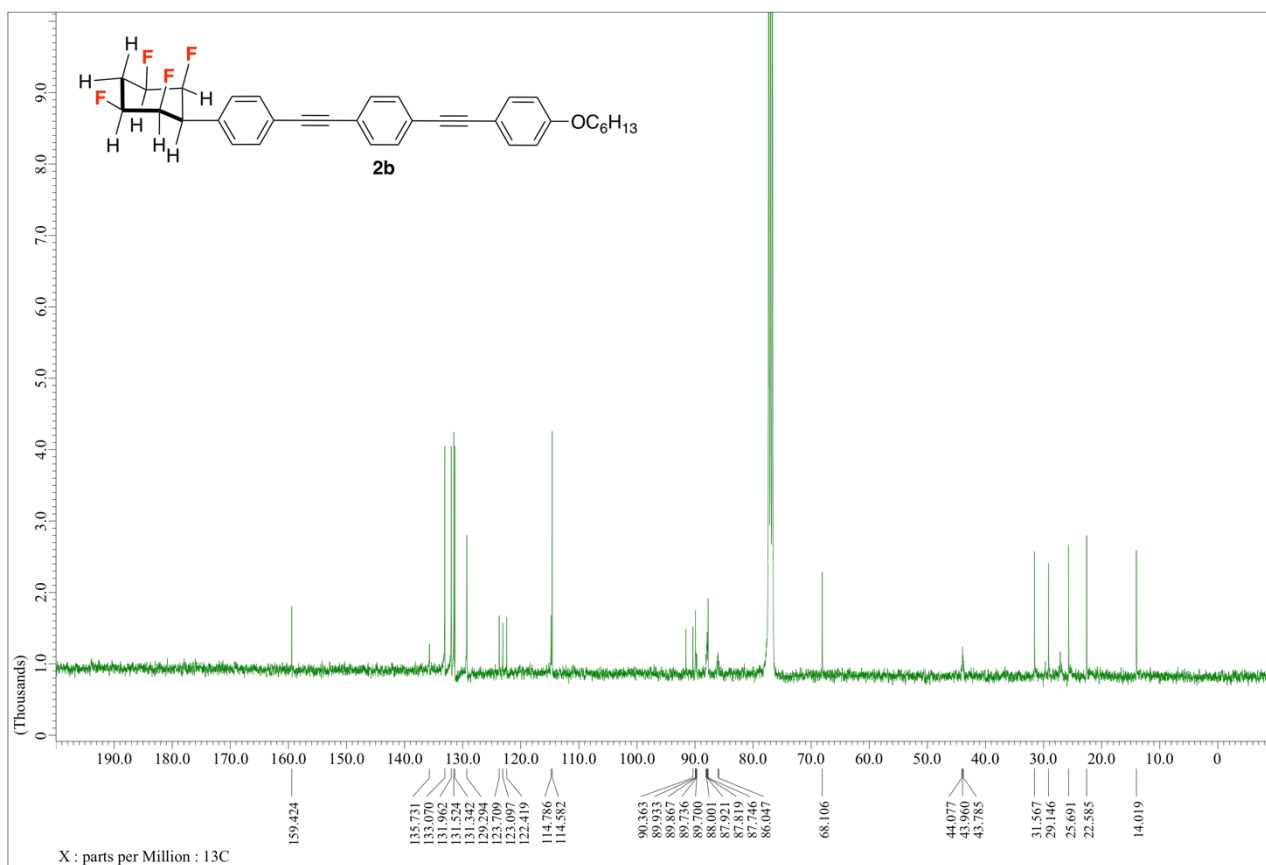

**Figure S9.** <sup>13</sup>C NMR spectrum of **2b** (solvent: CDCl<sub>3</sub>).

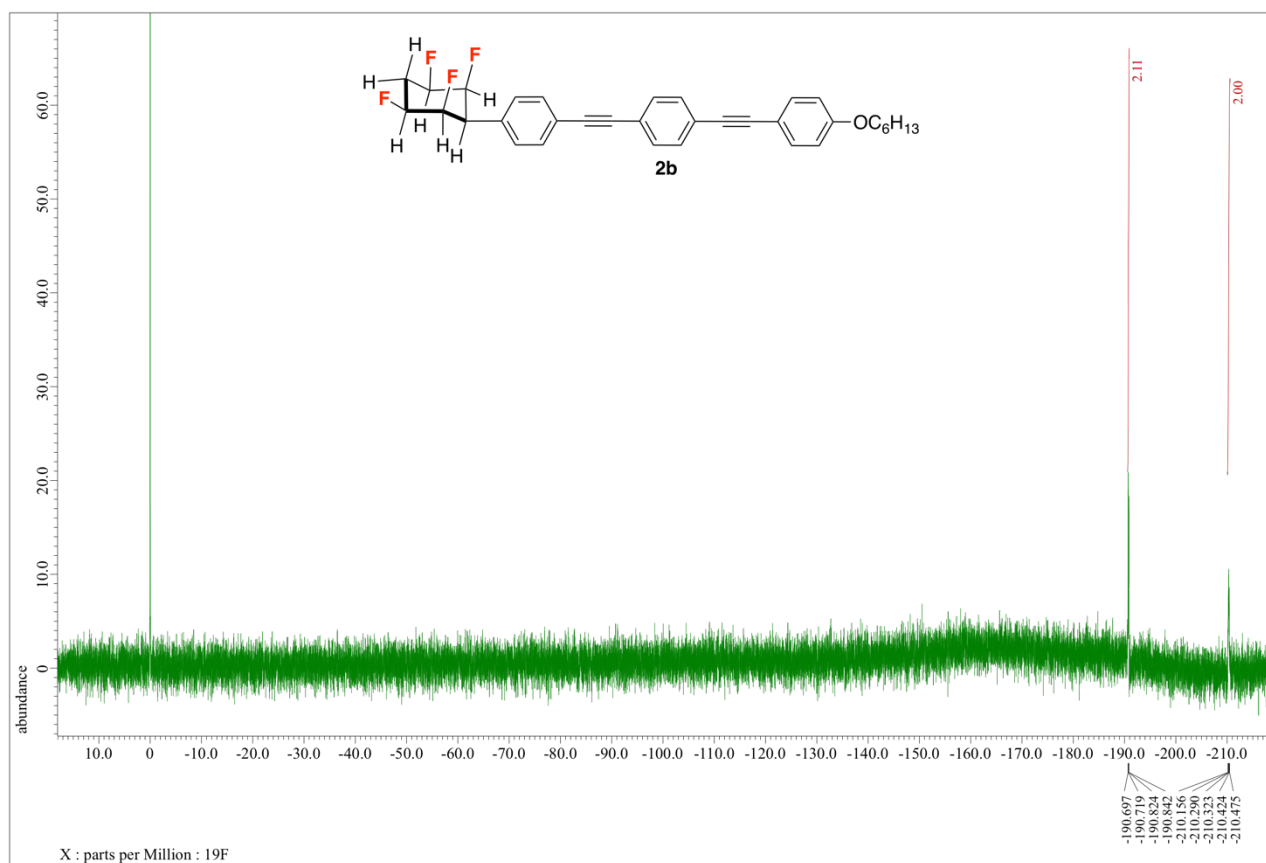

**Figure S10.**  $^{19}\text{F}$  NMR spectrum of **2b** (solvent:  $\text{CDCl}_3$ ; Internal reference:  $\text{CFCl}_3$ ).

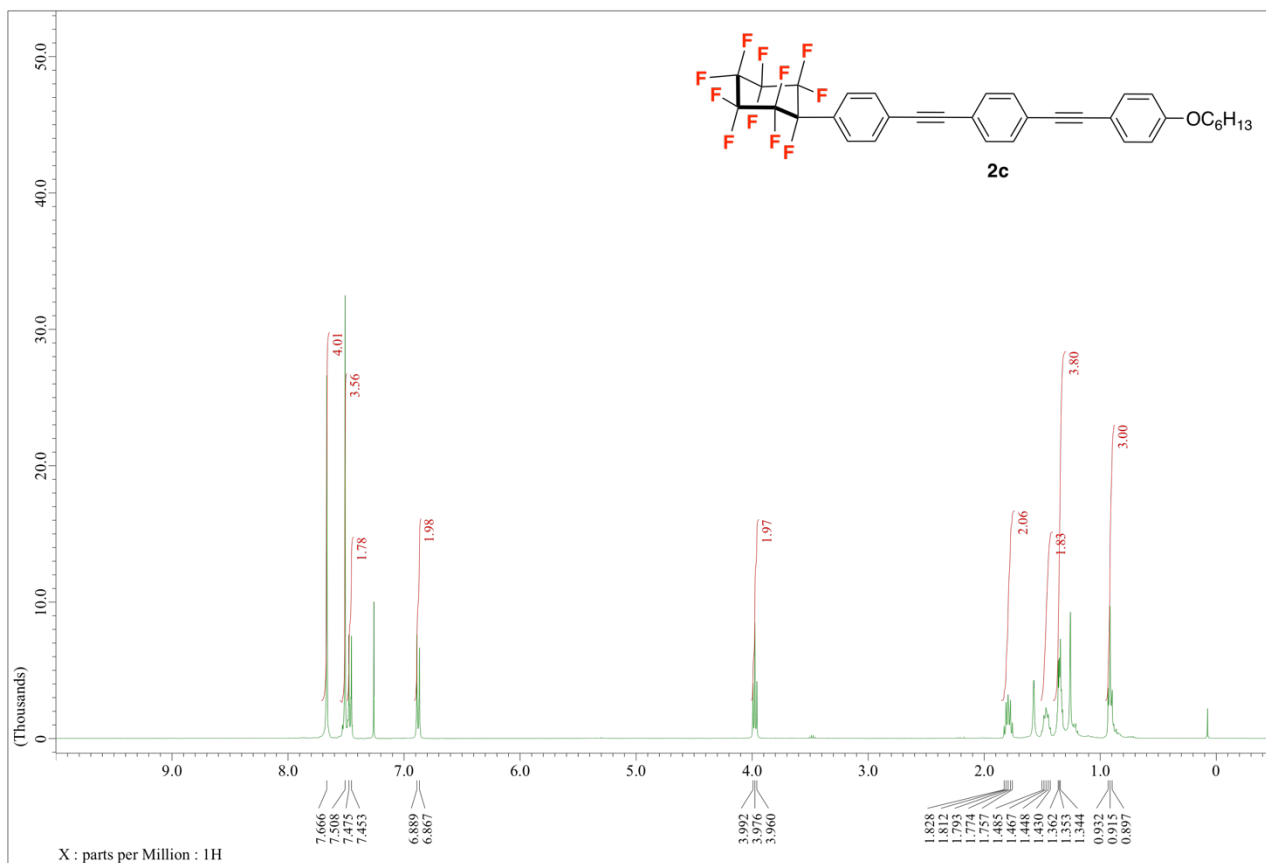

**Figure S11.** <sup>1</sup>H NMR spectrum of **2c** (solvent: CDCl<sub>3</sub>).

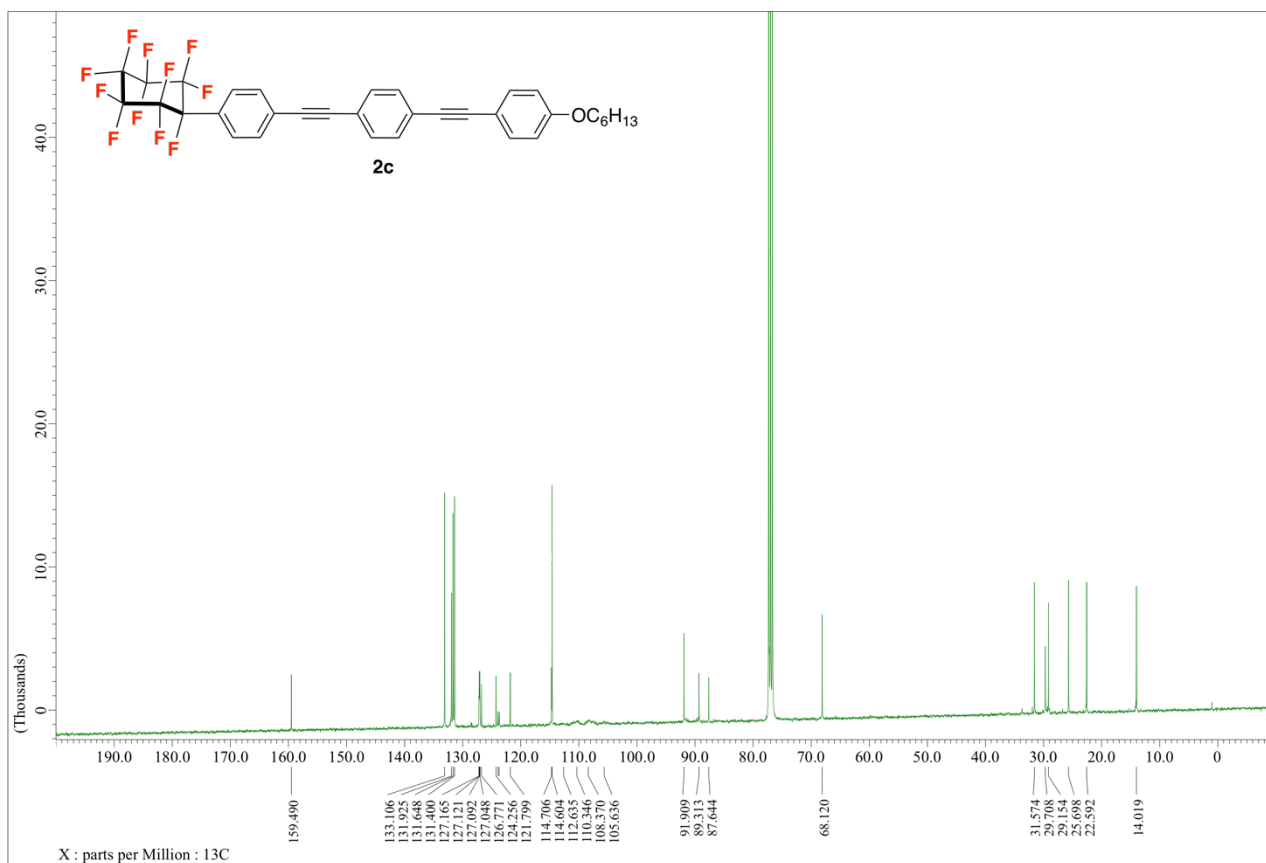

**Figure S12.** <sup>13</sup>C NMR spectrum of **2c** (solvent: CDCl<sub>3</sub>).

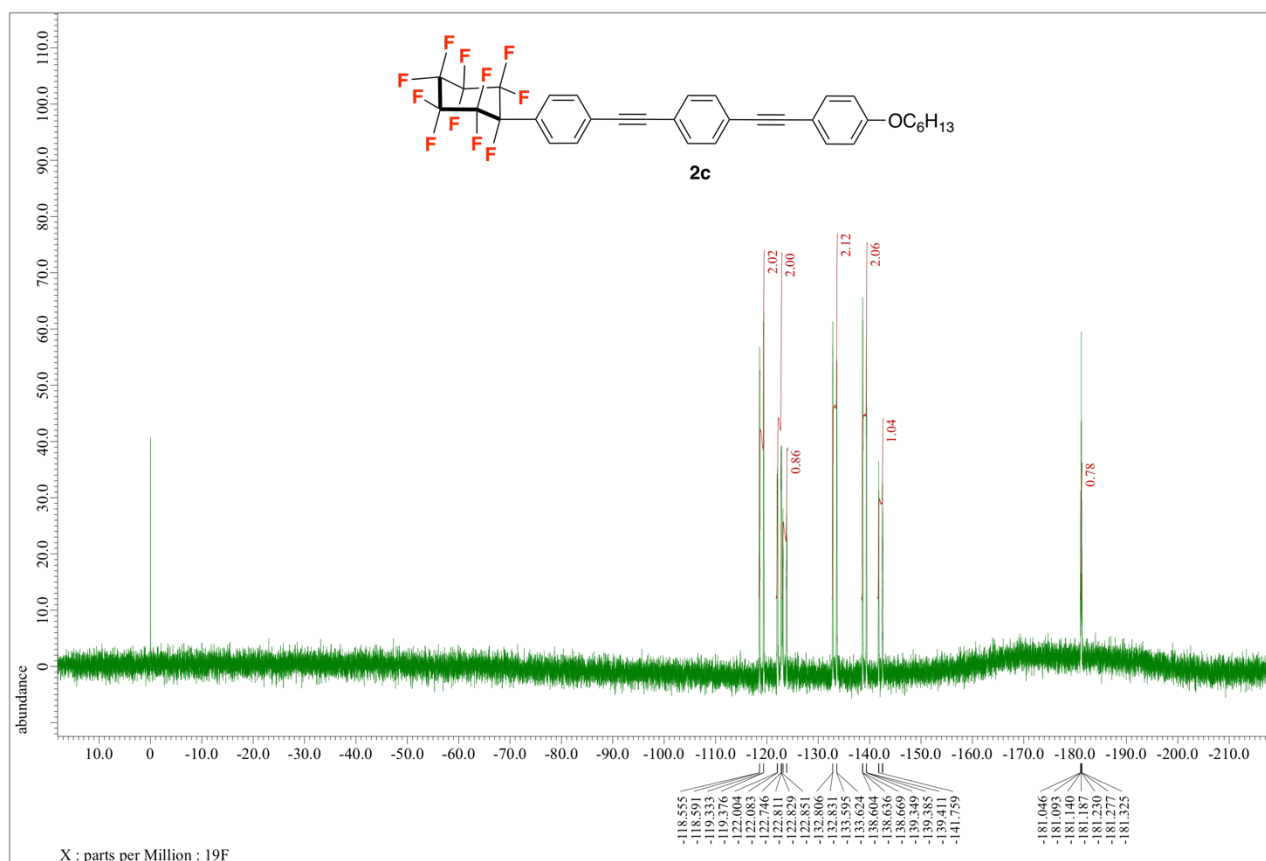

**Figure S13.** <sup>19</sup>F NMR spectrum of **2c** (solvent: CDCl<sub>3</sub>; Internal reference: CFCl<sub>3</sub>).

## 2. Crystallography

**Table S1.** Crystallographic data

|                                                                     | <b>2a</b>                                        | <b>2c</b>                                         |
|---------------------------------------------------------------------|--------------------------------------------------|---------------------------------------------------|
| CCDC No.                                                            | 2065068                                          | 2065069                                           |
| Empirical formula                                                   | C <sub>29</sub> H <sub>25</sub> F <sub>3</sub> O | C <sub>34</sub> H <sub>25</sub> F <sub>11</sub> O |
| Formula weight                                                      | 446.49                                           | 658.54                                            |
| Temperature [K]                                                     | 173(2)                                           | 173(2)                                            |
| Crystal color / Habit                                               | Colourless / Rod                                 | Colourless / Block                                |
| Crystal size [mm]                                                   | 0.19 x 0.10 x 0.09                               | 0.24 x 0.22 x 0.12                                |
| Crystal system                                                      | monoclinic                                       | Monoclinic                                        |
| Space group                                                         | <i>Cc</i>                                        | <i>P2</i> <sub>1</sub>                            |
| <i>a</i> [Å]                                                        | 51.666(2)                                        | 10.7246(3)                                        |
| <i>b</i> [Å]                                                        | 7.3498(3)                                        | 7.5494(2)                                         |
| <i>c</i> [Å]                                                        | 6.1422(3)                                        | 36.5923(8)                                        |
| $\alpha$ [°]                                                        | 90                                               | 90                                                |
| $\beta$ [°]                                                         | 92.441(4)                                        | 91.468(2)                                         |
| $\gamma$ [°]                                                        | 90                                               | 90                                                |
| <i>V</i> [Å <sup>3</sup> ]                                          | 2330.29(17)                                      | 2961.70(13)                                       |
| <i>Z</i>                                                            | 4                                                | 4                                                 |
| <i>R</i> [ <i>F</i> <sup>2</sup> > 2σ( <i>F</i> <sup>2</sup> )] [a] | 0.0320                                           | 0.0320                                            |
| <i>wR</i> ( <i>F</i> <sup>2</sup> ) [b]                             | 0.0893                                           | 0.0825                                            |

[a]  $R = \sum ||F_o| - |F_c|| / \sum |F_o|$ . [b]  $wR = \{[\sum w(|F_o| - |F_c|)] / \sum w|F_o|\}^{1/2}$ .

(a)

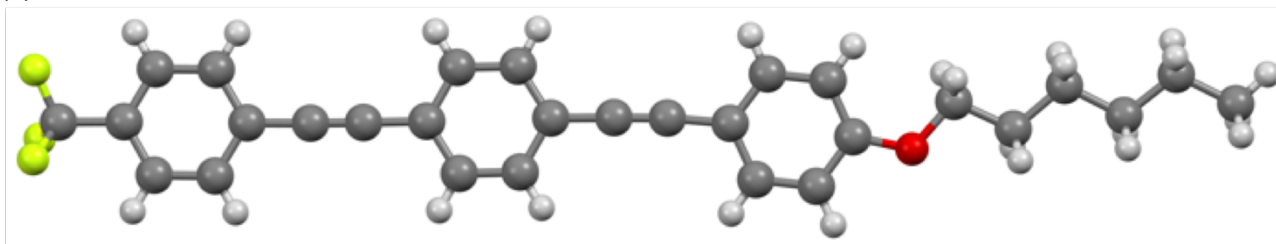

(b)

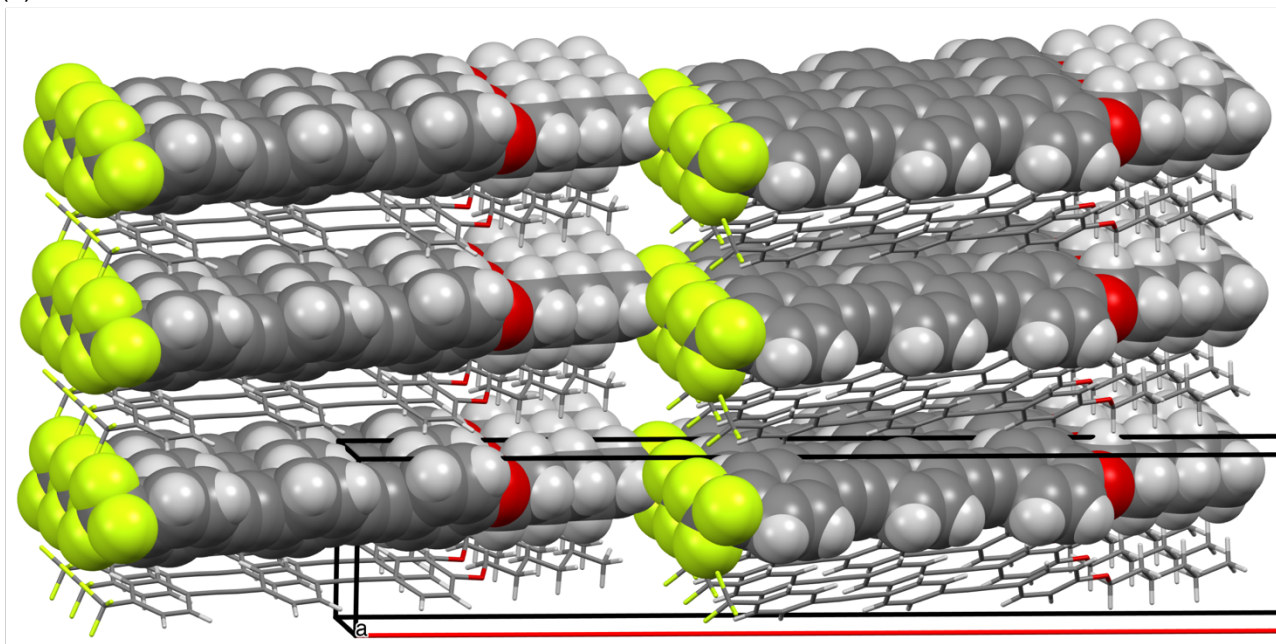

**Figure S14.** (a) Crystal structures and (b) packing structures of **2a**.

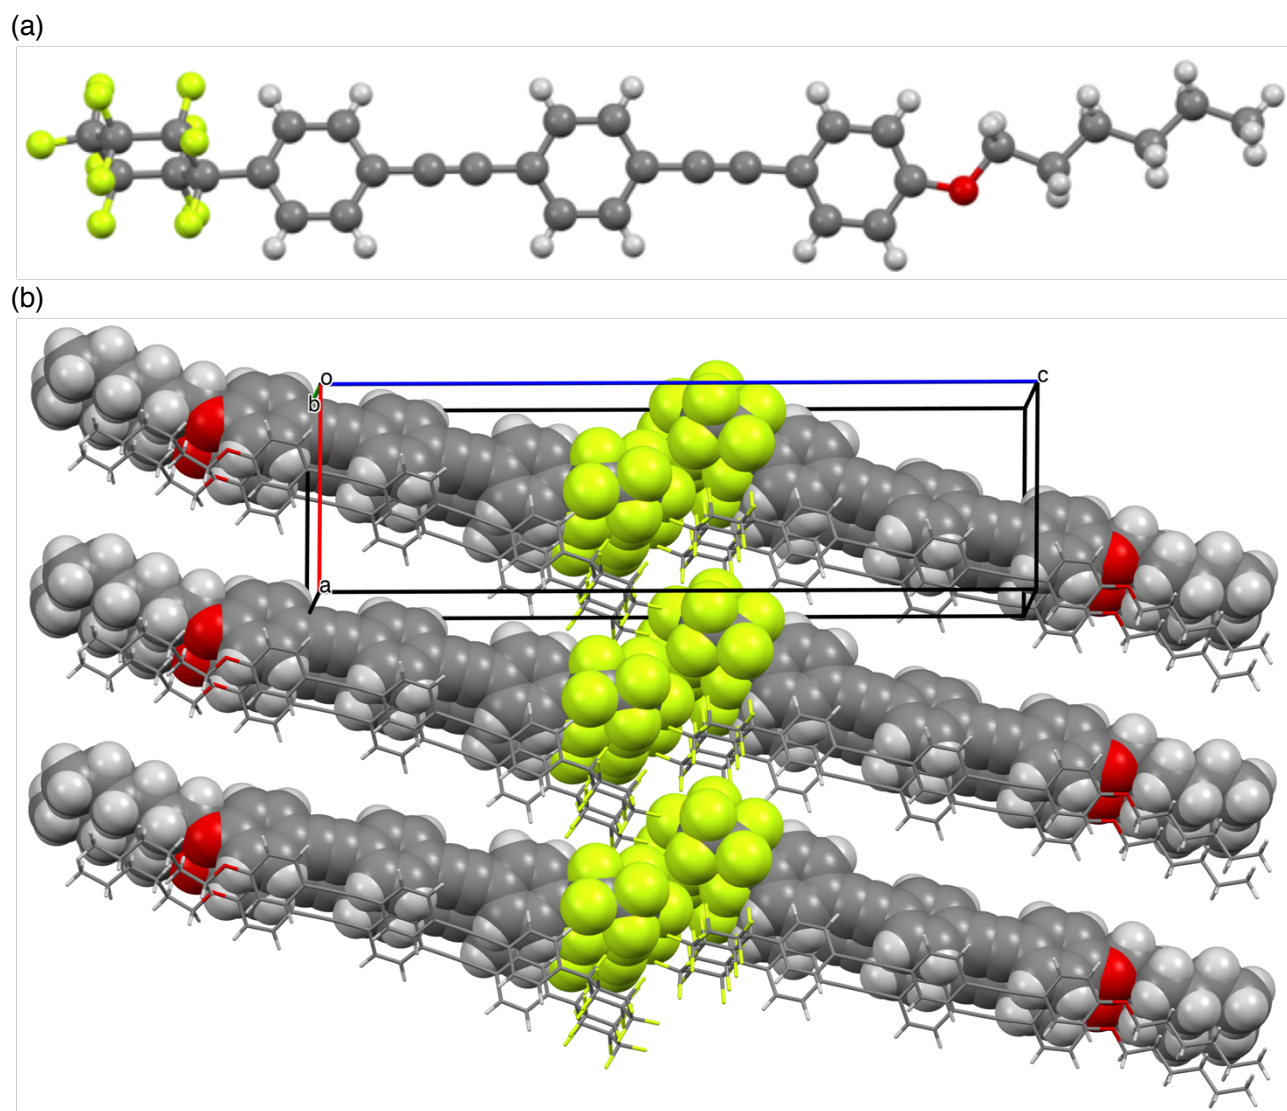

**Figure S15.** (a) Crystal structures and (b) packing structures of **2c**.

### 3. Quantum chemical calculation

All computations were performed using the Gaussian 16 (*Revision B.01*) software package. Geometry optimizations were carried out using the hybrid meta GGA functional (M06-2X) and the 6-31+G(d) basis set with the implicit solvation model (conductor-like polarizable continuum model; CPCM) for CH<sub>2</sub>Cl<sub>2</sub>. The vertical excitation energies and dipole moments of optimized structures were calculated using the time-dependent self-consistent field (TD-SCF) approximation at the same level of theory.

Compound **1a** (R = CH<sub>3</sub>)

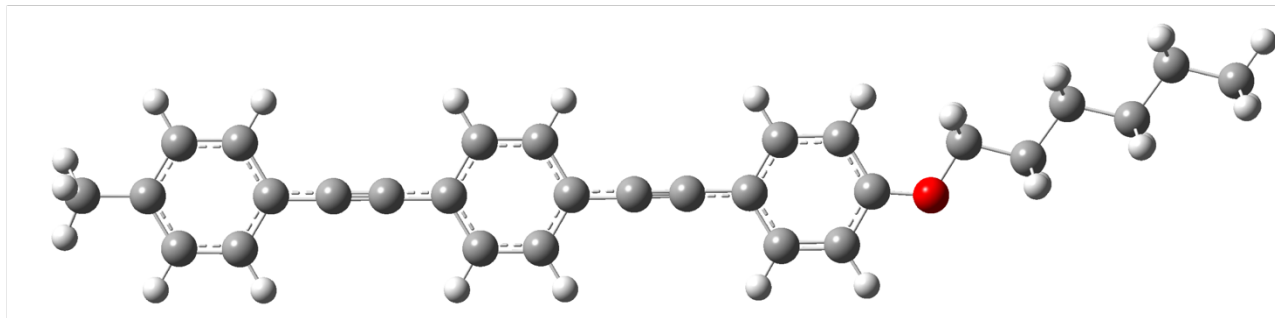

SCF Done: E(RM062X) = -1196.59584706 A.U. after 7 cycles

Dipole moment (field-independent basis, Debye):

X= 0.9606 Y= -1.7952 Z= -0.0406 Tot= 2.0365

**TD-SCF approximation (Energy calculation)** at M06-2X/6-31+G(d) with CPCM (CH<sub>2</sub>Cl<sub>2</sub>)

Excited State 1: Singlet-A 3.7531 eV 330.35 nm f=2.4831 <S\*\*2>=0.000

104 ->107 0.13791

105 ->106 0.67914

**TD-SCF approximation (Optimization calculation)** at M06-2X/6-31+G(d) with CPCM (CH<sub>2</sub>Cl<sub>2</sub>)

Excited State 1: Singlet-A 3.0201 eV 410.54 nm f=2.6800 <S\*\*2>=0.000

104 ->107 -0.11500

105 ->106 0.68998

LUMO (Hydrogen atoms are omitted for clarity)

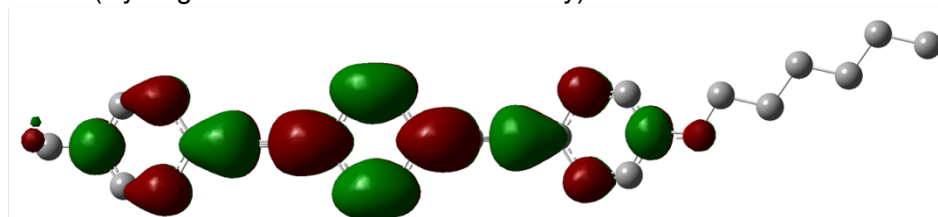

HOMO (Hydrogen atoms are omitted for clarity)

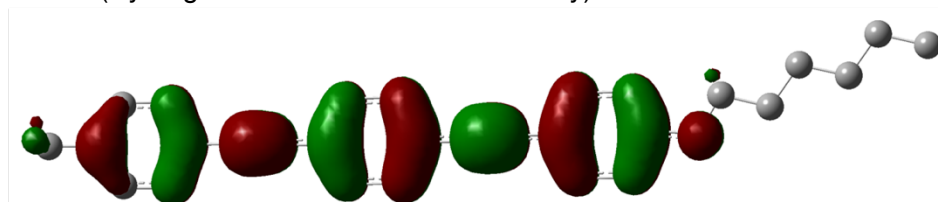

S<sub>0</sub>

S<sub>1</sub>

-1.27 eV

-1.64 eV

-6.88 eV

-6.50 eV

**Figure S16.** Optimized structure, HOMO and LUMO of **1a** and their orbital energies (eV). Computed with M06-2X/6-31+G(d).



**Table S2.** Cartesian Coordinates of **1a** (S<sub>0</sub> state)

| No. | Atom | Type | Coordinates (Angstroms) |           |           |    |   |   |            |           |           |
|-----|------|------|-------------------------|-----------|-----------|----|---|---|------------|-----------|-----------|
|     | No.  |      | x                       | y         | z         |    |   |   |            |           |           |
| 1   | 6    | 0    | 13.656952               | -1.010561 | 0.005347  | 29 | 6 | 0 | 4.519746   | -0.452383 | -0.001881 |
| 2   | 1    | 0    | 13.864652               | -0.398711 | -0.879818 | 30 | 1 | 0 | 5.108462   | -1.361961 | -0.001039 |
| 3   | 1    | 0    | 14.359902               | -1.849515 | 0.006577  | 31 | 6 | 0 | 0.901568   | 0.503768  | -0.003359 |
| 4   | 1    | 0    | 13.863065               | -0.397448 | 0.890007  | 32 | 6 | 0 | -0.309686  | 0.416209  | -0.003273 |
| 5   | 6    | 0    | 12.207444               | -1.492606 | 0.004397  | 33 | 6 | 0 | -1.736761  | 0.307875  | -0.002856 |
| 6   | 1    | 0    | 12.029143               | -2.125911 | -0.874865 | 34 | 6 | 0 | -2.540329  | 1.460984  | -0.000731 |
| 7   | 1    | 0    | 12.027582               | -2.124664 | 0.884238  | 35 | 1 | 0 | -2.0699    | 2.439272  | 0.000415  |
| 8   | 6    | 0    | 11.206099               | -0.338603 | 0.00269   | 36 | 6 | 0 | -3.923701  | 1.354081  | 0.000014  |
| 9   | 1    | 0    | 11.383975               | 0.294906  | -0.878101 | 37 | 1 | 0 | -4.538937  | 2.248423  | 0.001733  |
| 10  | 1    | 0    | 11.382482               | 0.296205  | 0.882845  | 38 | 6 | 0 | -4.540526  | 0.09139   | -0.001377 |
| 11  | 6    | 0    | 9.75219                 | -0.808007 | 0.001812  | 39 | 6 | 0 | -3.737168  | -1.061728 | -0.003659 |
| 12  | 1    | 0    | 9.577156                | -1.442088 | -0.87867  | 40 | 1 | 0 | -4.207747  | -2.039957 | -0.004774 |
| 13  | 1    | 0    | 9.575659                | -1.440695 | 0.882997  | 41 | 6 | 0 | -2.353937  | -0.954908 | -0.004368 |
| 14  | 6    | 0    | 8.759054                | 0.353534  | 0.00005   | 42 | 1 | 0 | -1.738722  | -1.849244 | -0.006034 |
| 15  | 1    | 0    | 8.919102                | 0.984867  | 0.882959  | 43 | 6 | 0 | -5.967662  | -0.019697 | -0.000275 |
| 16  | 1    | 0    | 8.920458                | 0.983361  | -0.883687 | 44 | 6 | 0 | -7.177967  | -0.116313 | 0.001395  |
| 17  | 6    | 0    | 7.324297                | -0.136109 | -0.000616 | 45 | 6 | 0 | -8.605745  | -0.234893 | 0.002724  |
| 18  | 1    | 0    | 7.121273                | -0.745657 | -0.891492 | 46 | 6 | 0 | -9.418216  | 0.909023  | 0.010704  |
| 19  | 1    | 0    | 7.119936                | -0.744095 | 0.891025  | 47 | 1 | 0 | -8.956958  | 1.892113  | 0.016588  |
| 20  | 8    | 0    | 6.470085                | 1.00561   | -0.002246 | 48 | 6 | 0 | -10.804123 | 0.783801  | 0.01491   |
| 21  | 6    | 0    | 5.129757                | 0.806853  | -0.002591 | 49 | 1 | 0 | -11.420082 | 1.67964   | 0.024145  |
| 22  | 6    | 0    | 4.338226                | 1.965467  | -0.003725 | 50 | 6 | 0 | -11.418394 | -0.473253 | 0.009187  |
| 23  | 1    | 0    | 4.830426                | 2.933043  | -0.004298 | 51 | 6 | 0 | -10.600197 | -1.610634 | 0.004069  |
| 24  | 6    | 0    | 2.95799                 | 1.867159  | -0.004039 | 52 | 1 | 0 | -11.057515 | -2.5973   | 0.004776  |
| 25  | 1    | 0    | 2.350756                | 2.767239  | -0.004863 | 53 | 6 | 0 | -9.215007  | -1.500871 | -0.000111 |
| 26  | 6    | 0    | 2.329171                | 0.607194  | -0.003262 | 54 | 1 | 0 | -8.594073  | -2.391776 | -0.002648 |
| 27  | 6    | 0    | 3.129565                | -0.542093 | -0.002227 | 55 | 6 | 0 | -12.919282 | -0.607497 | -0.012862 |
| 28  | 1    | 0    | 2.658346                | -1.520356 | -0.001632 | 56 | 1 | 0 | -13.253408 | -1.410996 | 0.650175  |
|     |      |      |                         |           |           | 57 | 1 | 0 | -13.404778 | 0.321415  | 0.297427  |
|     |      |      |                         |           |           | 58 | 1 | 0 | -13.271087 | -0.848093 | -1.022543 |

**Table S3.** Cartesian Coordinates of **1a** (S<sub>1</sub> state)

| No. | Atom | Type | Coordinates (Angstroms) |           |           | 29 | 6 | 0 | -4.490545 | -0.477223 | 0.00589   |
|-----|------|------|-------------------------|-----------|-----------|----|---|---|-----------|-----------|-----------|
|     | No.  | x    | y                       | z         | 30        |    |   |   |           |           |           |
| 1   | 6    | 0    | -13.640161              | -0.971979 | -0.009374 | 31 | 6 | 0 | -0.903635 | 0.494932  | 0.005554  |
| 2   | 1    | 0    | -13.843839              | -0.356555 | 0.874235  | 32 | 6 | 0 | 0.333235  | 0.406078  | 0.005599  |
| 3   | 1    | 0    | -14.35003               | -1.805063 | -0.009699 | 33 | 6 | 0 | 1.708716  | 0.30395   | 0.005077  |
| 4   | 1    | 0    | -13.840055              | -0.359091 | -0.895607 | 34 | 6 | 0 | 2.542822  | 1.480793  | 0.001688  |
| 5   | 6    | 0    | -12.194768              | -1.46618  | -0.00558  | 35 | 1 | 0 | 2.065586  | 2.456084  | -0.000051 |
| 6   | 1    | 0    | -12.022811              | -2.098982 | 0.875283  | 36 | 6 | 0 | 3.903388  | 1.376958  | 0.000484  |
| 7   | 1    | 0    | -12.019079              | -2.101552 | -0.883856 | 37 | 1 | 0 | 4.521918  | 2.269408  | -0.002205 |
| 8   | 6    | 0    | -11.184008              | -0.320416 | -0.005125 | 38 | 6 | 0 | 4.550275  | 0.090184  | 0.002674  |
| 9   | 1    | 0    | -11.357578              | 0.316392  | 0.8741    | 39 | 6 | 0 | 3.718108  | -1.085395 | 0.006461  |
| 10  | 1    | 0    | -11.353911              | 0.313828  | -0.886914 | 40 | 1 | 0 | 4.19608   | -2.060382 | 0.008278  |
| 11  | 6    | 0    | -9.734178               | -0.802298 | -0.001429 | 41 | 6 | 0 | 2.357441  | -0.984404 | 0.00758   |
| 12  | 1    | 0    | -9.565369               | -1.435524 | 0.880797  | 42 | 1 | 0 | 1.739456  | -1.87717  | 0.01028   |
| 13  | 1    | 0    | -9.561829               | -1.438269 | -0.880996 | 43 | 6 | 0 | 5.930445  | -0.015044 | 0.001014  |
| 14  | 6    | 0    | -8.732011               | 0.351623  | -0.00125  | 44 | 6 | 0 | 7.162845  | -0.112565 | -0.001137 |
| 15  | 1    | 0    | -8.885536               | 0.981796  | -0.885983 | 45 | 6 | 0 | 8.559235  | -0.227544 | -0.003541 |
| 16  | 1    | 0    | -8.888768               | 0.984389  | 0.881064  | 46 | 6 | 0 | 9.388198  | 0.924052  | -0.010595 |
| 17  | 6    | 0    | -7.302408               | -0.151608 | 0.002023  | 47 | 1 | 0 | 8.927411  | 1.907332  | -0.014984 |
| 18  | 1    | 0    | -7.102224               | -0.757732 | 0.895254  | 48 | 6 | 0 | 10.767693 | 0.794792  | -0.015754 |
| 19  | 1    | 0    | -7.099287               | -0.760729 | -0.888504 | 49 | 1 | 0 | 11.385877 | 1.68936   | -0.023776 |
| 20  | 8    | 0    | -6.436649               | 0.985371  | 0.001507  | 50 | 6 | 0 | 11.385653 | -0.465967 | -0.012168 |
| 21  | 6    | 0    | -5.105016               | 0.788612  | 0.00299   | 51 | 6 | 0 | 10.563917 | -1.60705  | -0.00813  |
| 22  | 6    | 0    | -4.311757               | 1.955745  | 0.001373  | 52 | 1 | 0 | 11.02421  | -2.592556 | -0.01015  |
| 23  | 1    | 0    | -4.810948               | 2.91977   | -0.000766 | 53 | 6 | 0 | 9.184277  | -1.503115 | -0.00298  |
| 24  | 6    | 0    | -2.939633               | 1.865657  | 0.002352  | 54 | 1 | 0 | 8.564346  | -2.394689 | -0.001442 |
| 25  | 1    | 0    | -2.332815               | 2.765712  | 0.000998  | 55 | 6 | 0 | 12.883736 | -0.600078 | 0.011389  |
| 26  | 6    | 0    | -2.292738               | 0.593628  | 0.005041  | 56 | 1 | 0 | 13.219802 | -1.404114 | -0.650922 |
| 27  | 6    | 0    | -3.110153               | -0.569522 | 0.006904  | 57 | 1 | 0 | 13.370641 | 0.329114  | -0.29636  |
| 28  | 1    | 0    | -2.63583                | -1.54599  | 0.009053  | 58 | 1 | 0 | 13.236876 | -0.842889 | 1.021318  |

Compound **1b** (R = *cyclo*-C<sub>6</sub>H<sub>11</sub>)

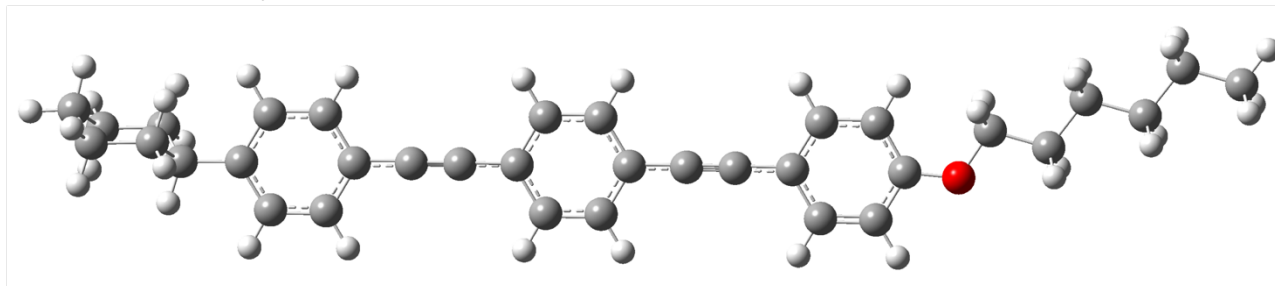

SCF Done: E(RM062X) = -1391.87434008 A.U. after 7 cycles

Dipole moment (field-independent basis, Debye):

X= -0.6931 Y= -1.7924 Z= -0.0282 Tot= 1.9220

**TD-SCF approximation (Energy calculation)** at M06-2X/6-31+G(d) with CPCM (CH<sub>2</sub>Cl<sub>2</sub>)

Excited State 1: Singlet-A 3.7461 eV 330.97 nm f=2.5923 <S\*\*2>=0.000

123 ->126 -0.14019

124 ->125 0.67889

**TD-SCF approximation (Optimization calculation)** at M06-2X/6-31+G(d) with CPCM (CH<sub>2</sub>Cl<sub>2</sub>)

Excited State 1: Singlet-A 3.0168 eV 410.98 nm f=2.7434 <S\*\*2>=0.000

123 ->126 -0.11596

124 ->125 0.68990

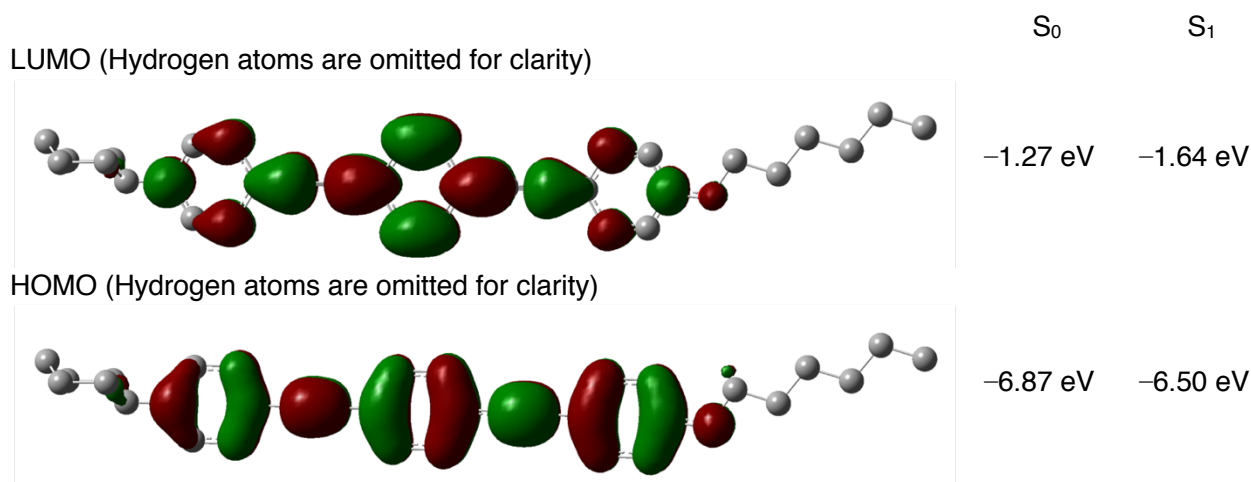

**Figure S17.** HOMO and LUMO of **1b** and their orbital energies (eV). Computed with M06-2X/6-31+G(d).

**Table S4.** Cartesian Coordinates of **1b** ( $S_0$  state)

| No. | Atom | Type | Coordinates (Angstroms) |           |           |    |   |   |           |           |           |
|-----|------|------|-------------------------|-----------|-----------|----|---|---|-----------|-----------|-----------|
|     | No.  |      | x                       | y         | z         |    |   |   |           |           |           |
| 1   | 6    | 0    | -15.877998              | -1.232366 | -0.126765 | 36 | 1 | 0 | 2.055624  | -1.795922 | 0.188554  |
| 2   | 1    | 0    | -16.120489              | -0.603789 | 0.737599  | 37 | 6 | 0 | 2.298425  | 0.343077  | 0.050225  |
| 3   | 1    | 0    | -16.566819              | -2.082944 | -0.127691 | 38 | 6 | 0 | 1.628971  | 1.576658  | -0.022004 |
| 4   | 1    | 0    | -16.069106              | -0.643488 | -1.031032 | 39 | 1 | 0 | 2.205909  | 2.49406   | -0.084808 |
| 5   | 6    | 0    | -14.421374              | -1.689507 | -0.07419  | 40 | 6 | 0 | 0.242546  | 1.625591  | -0.015009 |
| 6   | 1    | 0    | -14.206812              | -2.339455 | -0.932962 | 41 | 1 | 0 | -0.268729 | 2.581457  | -0.072392 |
| 7   | 1    | 0    | -14.257227              | -2.298221 | 0.824958  | 42 | 6 | 0 | -0.511915 | 0.442333  | 0.064542  |
| 8   | 6    | 0    | -13.439728              | -0.518754 | -0.073744 | 43 | 6 | 0 | 3.728914  | 0.293182  | 0.038475  |
| 9   | 1    | 0    | -13.601752              | 0.090701  | -0.974366 | 44 | 6 | 0 | 4.942342  | 0.252916  | 0.025161  |
| 10  | 1    | 0    | -13.652986              | 0.13345   | 0.785275  | 45 | 6 | 0 | 6.374249  | 0.209482  | 0.007584  |
| 11  | 6    | 0    | -11.978588              | -0.962099 | -0.020641 | 46 | 6 | 0 | 7.052794  | -1.019702 | 0.063369  |
| 12  | 1    | 0    | -11.767744              | -1.616869 | -0.877803 | 47 | 1 | 0 | 6.481918  | -1.941763 | 0.121065  |
| 13  | 1    | 0    | -11.816209              | -1.56688  | 0.882586  | 48 | 6 | 0 | 8.441611  | -1.05503  | 0.044432  |
| 14  | 6    | 0    | -11.006906              | 0.217292  | -0.02826  | 49 | 1 | 0 | 8.943534  | -2.018685 | 0.087745  |
| 15  | 1    | 0    | -11.15385               | 0.817362  | -0.934938 | 50 | 6 | 0 | 9.197957  | 0.123777  | -0.029491 |
| 16  | 1    | 0    | -11.204463              | 0.87159   | 0.83004   | 51 | 6 | 0 | 8.512981  | 1.342737  | -0.084486 |
| 17  | 6    | 0    | -9.563438               | -0.24279  | 0.025971  | 52 | 1 | 0 | 9.079011  | 2.269501  | -0.142546 |
| 18  | 1    | 0    | -9.369407               | -0.81227  | 0.944893  | 53 | 6 | 0 | 7.122343  | 1.393723  | -0.06692  |
| 19  | 1    | 0    | -9.325578               | -0.880864 | -0.835867 | 54 | 1 | 0 | 6.608137  | 2.349243  | -0.110752 |
| 20  | 8    | 0    | -8.733561               | 0.916382  | 0.001046  | 55 | 6 | 0 | 10.709489 | 0.081717  | -0.051945 |
| 21  | 6    | 0    | -7.389372               | 0.748134  | 0.023606  | 56 | 6 | 0 | 11.288208 | -0.545363 | 1.228406  |
| 22  | 6    | 0    | -6.75088                | -0.495237 | 0.087777  | 57 | 6 | 0 | 12.818819 | -0.553946 | 1.201601  |
| 23  | 1    | 0    | -7.318824               | -1.417188 | 0.126221  | 58 | 6 | 0 | 13.346465 | -1.279069 | -0.038872 |
| 24  | 6    | 0    | -5.358932               | -0.552529 | 0.102472  | 59 | 6 | 0 | 12.775609 | -0.662852 | -1.318367 |
| 25  | 1    | 0    | -4.865615               | -1.518615 | 0.151334  | 60 | 6 | 0 | 11.244959 | -0.653797 | -1.293126 |
| 26  | 6    | 0    | -4.585157               | 0.613749  | 0.054187  | 61 | 1 | 0 | 11.068524 | 1.120701  | -0.102799 |
| 27  | 6    | 0    | -5.242689               | 1.857559  | -0.00769  | 62 | 1 | 0 | 10.846763 | -0.183306 | -2.200278 |
| 28  | 1    | 0    | -4.656119               | 2.770475  | -0.045243 | 63 | 1 | 0 | 14.442024 | -1.250796 | -0.05883  |
| 29  | 6    | 0    | -6.624614               | 1.923664  | -0.022497 | 64 | 1 | 0 | 13.054979 | -2.338249 | 0.011947  |
| 30  | 1    | 0    | -7.138811               | 2.878479  | -0.071438 | 65 | 1 | 0 | 10.920419 | 0.001221  | 2.105205  |
| 31  | 6    | 0    | -3.155448               | 0.54625   | 0.063203  | 66 | 1 | 0 | 13.185352 | 0.482715  | 1.197563  |
| 32  | 6    | 0    | -1.94209                | 0.495431  | 0.066455  | 67 | 1 | 0 | 13.140448 | 0.369806  | -1.416245 |
| 33  | 6    | 0    | 0.157745                | -0.791119 | 0.138835  | 68 | 1 | 0 | 10.876762 | -1.690038 | -1.282887 |
| 34  | 1    | 0    | -0.419012               | -1.708641 | 0.201204  | 69 | 1 | 0 | 10.922907 | -1.57854  | 1.319923  |
| 35  | 6    | 0    | 1.544366                | -0.839996 | 0.131723  | 70 | 1 | 0 | 13.205948 | -1.023901 | 2.112992  |
|     |      |      |                         |           |           | 71 | 1 | 0 | 13.131802 | -1.210079 | -2.198711 |

**Table S5.** Cartesian Coordinates of **1b** (S<sub>1</sub> state)

| No. | Atom | Type | Coordinates (Angstroms) |           |           |    |   |   |            |           |           |
|-----|------|------|-------------------------|-----------|-----------|----|---|---|------------|-----------|-----------|
|     | No.  |      | x                       | y         | z         |    |   |   |            |           |           |
| 1   | 6    | 0    | 15.849018               | -1.229888 | 0.066254  | 36 | 1 | 0 | -2.04267   | -1.802722 | -0.091066 |
| 2   | 1    | 0    | 16.078419               | -0.604489 | -0.803954 | 37 | 6 | 0 | -2.313326  | 0.359121  | -0.028485 |
| 3   | 1    | 0    | 16.540295               | -2.078453 | 0.062026  | 38 | 6 | 0 | -1.616814  | 1.619504  | 0.003192  |
| 4   | 1    | 0    | 16.050015               | -0.636458 | 0.965385  | 39 | 1 | 0 | -2.200179  | 2.534911  | 0.030548  |
| 5   | 6    | 0    | 14.39326                | -1.691647 | 0.03453   | 40 | 6 | 0 | -0.253321  | 1.670349  | -0.00018  |
| 6   | 1    | 0    | 14.191527               | -2.337754 | 0.899281  | 41 | 1 | 0 | 0.261488   | 2.626017  | 0.024468  |
| 7   | 1    | 0    | 14.219554               | -2.305389 | -0.85937  | 42 | 6 | 0 | 0.534431   | 0.462613  | -0.035513 |
| 8   | 6    | 0    | 13.408353               | -0.523663 | 0.040459  | 43 | 6 | 0 | -3.696338  | 0.309341  | -0.022184 |
| 9   | 1    | 0    | 13.580014               | 0.091182  | 0.935555  | 44 | 6 | 0 | -4.932011  | 0.265989  | -0.0153   |
| 10  | 1    | 0    | 13.608457               | 0.124302  | -0.824884 | 45 | 6 | 0 | -6.331934  | 0.219582  | -0.005896 |
| 11  | 6    | 0    | 11.948094               | -0.971937 | 0.00853   | 46 | 6 | 0 | -7.021589  | -1.022332 | -0.034588 |
| 12  | 1    | 0    | 11.749332               | -1.620309 | 0.873354  | 47 | 1 | 0 | -6.447586  | -1.943717 | -0.064797 |
| 13  | 1    | 0    | 11.776577               | -1.584072 | -0.887929 | 48 | 6 | 0 | -8.404367  | -1.057604 | -0.024092 |
| 14  | 6    | 0    | 10.973612               | 0.205325  | 0.018048  | 49 | 1 | 0 | -8.904865  | -2.022944 | -0.046255 |
| 15  | 1    | 0    | 11.130234               | 0.814105  | 0.917117  | 50 | 6 | 0 | -9.169655  | 0.123449  | 0.014747  |
| 16  | 1    | 0    | 11.15759                | 0.851512  | -0.849186 | 51 | 6 | 0 | -8.485912  | 1.349902  | 0.042922  |
| 17  | 6    | 0    | 9.531987                | -0.261474 | -0.013543 | 52 | 1 | 0 | -9.058462  | 2.274182  | 0.073268  |
| 18  | 1    | 0    | 9.327032                | -0.841772 | -0.92271  | 53 | 6 | 0 | -7.101774  | 1.410792  | 0.033251  |
| 19  | 1    | 0    | 9.302577                | -0.885135 | 0.860411  | 54 | 1 | 0 | -6.592365  | 2.369567  | 0.055623  |
| 20  | 8    | 0    | 8.696393                | 0.897603  | 0.003429  | 55 | 6 | 0 | -10.677961 | 0.075022  | 0.027408  |
| 21  | 6    | 0    | 7.359974                | 0.73725   | -0.009576 | 56 | 6 | 0 | -11.245443 | -0.583804 | -1.243921 |
| 22  | 6    | 0    | 6.710773                | -0.51047  | -0.048011 | 57 | 6 | 0 | -12.776163 | -0.600028 | -1.227719 |
| 23  | 1    | 0    | 7.277837                | -1.433671 | -0.071122 | 58 | 6 | 0 | -13.309404 | -1.301302 | 0.02382   |
| 24  | 6    | 0    | 5.328198                | -0.564173 | -0.056762 | 59 | 6 | 0 | -12.751365 | -0.654456 | 1.293667  |
| 25  | 1    | 0    | 4.827103                | -1.526725 | -0.086119 | 60 | 6 | 0 | -11.22063  | -0.638071 | 1.280358  |
| 26  | 6    | 0    | 4.543544                | 0.62072   | -0.027437 | 61 | 1 | 0 | -11.043449 | 1.112641  | 0.053327  |
| 27  | 6    | 0    | 5.225388                | 1.873742  | 0.00965   | 62 | 1 | 0 | -10.832164 | -0.146174 | 2.180197  |
| 28  | 1    | 0    | 4.643785                | 2.790024  | 0.031908  | 63 | 1 | 0 | -14.405208 | -1.278382 | 0.035075  |
| 29  | 6    | 0    | 6.599439                | 1.92555   | 0.01821   | 64 | 1 | 0 | -13.012072 | -2.359734 | -0.001984 |
| 30  | 1    | 0    | 7.125182                | 2.874905  | 0.047187  | 65 | 1 | 0 | -10.874491 | -0.053818 | -2.129401 |
| 31  | 6    | 0    | 3.151927                | 0.562414  | -0.033088 | 66 | 1 | 0 | -13.148053 | 0.434506  | -1.248813 |
| 32  | 6    | 0    | 1.912956                | 0.513963  | -0.035351 | 67 | 1 | 0 | -13.122219 | 0.378093  | 1.366635  |
| 33  | 6    | 0    | -0.163673               | -0.799066 | -0.069216 | 68 | 1 | 0 | -10.84703  | -1.672241 | 1.294825  |
| 34  | 1    | 0    | 0.419062                | -1.7148   | -0.09714  | 69 | 1 | 0 | -10.873468 | -1.616468 | -1.310323 |
| 35  | 6    | 0    | -1.527332               | -0.847302 | -0.065821 | 70 | 1 | 0 | -13.153559 | -1.091487 | -2.131893 |
|     |      |      |                         |           |           | 71 | 1 | 0 | -13.111023 | -1.18452  | 2.183143  |

Compound **2a** (R = CF<sub>3</sub>)

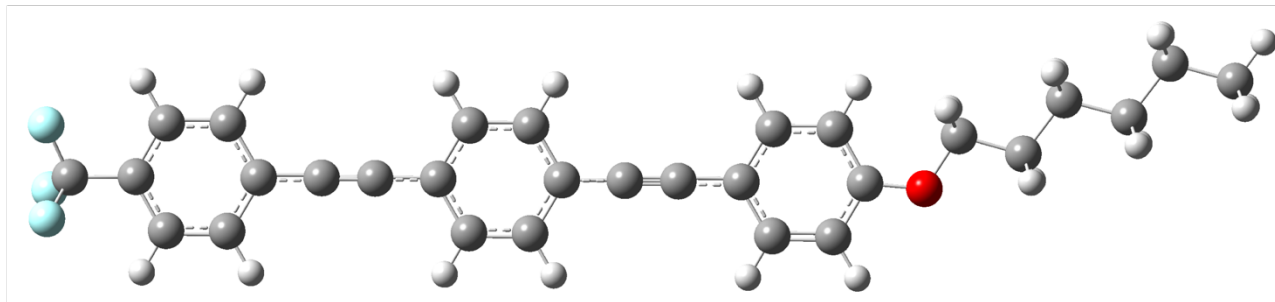

SCF Done: E(RM062X) = -1494.25488395 A.U. after 7 cycles

Dipole moment (field-independent basis, Debye):

X= 6.1945 Y= -1.4880 Z= -0.0717 Tot= 6.3712

**TD-SCF approximation (Energy calculation)** at M06-2X/6-31+G(d) with CPCM (CH<sub>2</sub>Cl<sub>2</sub>)

|                  |           |           |           |          |              |
|------------------|-----------|-----------|-----------|----------|--------------|
| Excited State 1: | Singlet-A | 3.7172 eV | 333.54 nm | f=2.3994 | <S**2>=0.000 |
| 116 ->118        | -0.14513  |           |           |          |              |
| 116 ->119        | -0.10752  |           |           |          |              |
| 117 ->118        | 0.65997   |           |           |          |              |
| 117 ->119        | -0.13713  |           |           |          |              |

**TD-SCF approximation (Optimization calculation)** at M06-2X/6-31+G(d) with CPCM (CH<sub>2</sub>Cl<sub>2</sub>)

|                  |           |           |           |          |              |
|------------------|-----------|-----------|-----------|----------|--------------|
| Excited State 1: | Singlet-A | 2.9739 eV | 416.91 nm | f=2.6217 | <S**2>=0.000 |
| 116 ->119        | -0.10285  |           |           |          |              |
| 117 ->118        | 0.68245   |           |           |          |              |

LUMO (Hydrogen atoms are omitted for clarity)

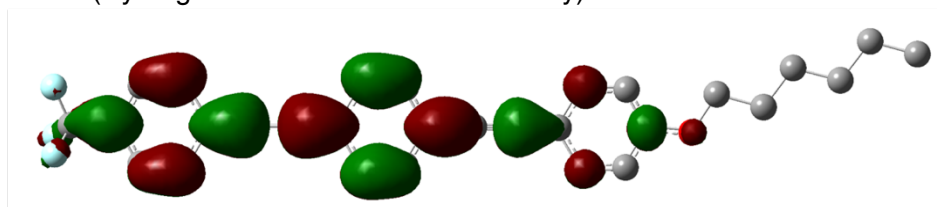

S<sub>0</sub>

S<sub>1</sub>

-1.50 eV

-1.87 eV

HOMO (Hydrogen atoms are omitted for clarity)

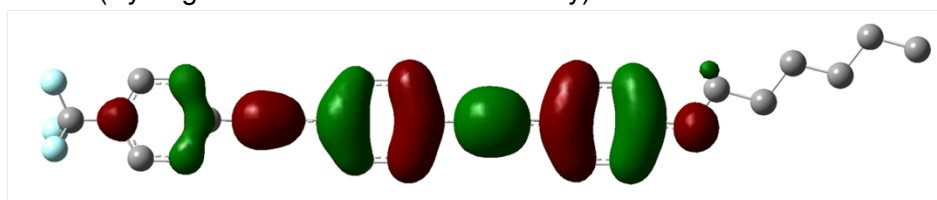

-6.99 eV

-6.64 eV

**Figure S18.** HOMO and LUMO of **2a** and their orbital energies (eV). Computed with M06-2X/6-31+G(d).

**Table S6.** Cartesian Coordinates of **2a** (S<sub>0</sub> state)

| No. | Atom | Type | Coordinates (Angstroms) |           |           |    |   |   |            |           |           |
|-----|------|------|-------------------------|-----------|-----------|----|---|---|------------|-----------|-----------|
|     | No.  |      | x                       | y         | z         |    |   |   |            |           |           |
| 1   | 6    | 0    | 15.028334               | -1.041558 | -0.024738 | 29 | 6 | 0 | 5.890583   | -0.467051 | 0.015994  |
| 2   | 1    | 0    | 15.230439               | -0.43547  | -0.91514  | 30 | 1 | 0 | 6.476501   | -1.378419 | 0.021598  |
| 3   | 1    | 0    | 15.73052                | -1.881139 | -0.023104 | 31 | 6 | 0 | 2.275977   | 0.502351  | 0.014039  |
| 4   | 1    | 0    | 15.241112               | -0.423097 | 0.854605  | 32 | 6 | 0 | 1.064204   | 0.42297   | 0.014713  |
| 5   | 6    | 0    | 13.578414               | -1.52223  | -0.012636 | 33 | 6 | 0 | -0.363667  | 0.329501  | 0.014164  |
| 6   | 1    | 0    | 13.393455               | -2.160849 | -0.88666  | 34 | 6 | 0 | -1.15289   | 1.492625  | 0.005801  |
| 7   | 1    | 0    | 13.404056               | -2.148569 | 0.872376  | 35 | 1 | 0 | -0.670499  | 2.464949  | 0.000657  |
| 8   | 6    | 0    | 12.578228               | -0.367238 | -0.0147   | 36 | 6 | 0 | -2.53718   | 1.402254  | 0.003627  |
| 9   | 1    | 0    | 12.750851               | 0.260659  | -0.900535 | 37 | 1 | 0 | -3.142353  | 2.303345  | -0.00322  |
| 10  | 1    | 0    | 12.761163               | 0.272786  | 0.860325  | 38 | 6 | 0 | -3.166959  | 0.146286  | 0.009762  |
| 11  | 6    | 0    | 11.123801               | -0.834933 | -0.003035 | 39 | 6 | 0 | -2.379154  | -1.017046 | 0.01881   |
| 12  | 1    | 0    | 10.942176               | -1.47415  | -0.878452 | 40 | 1 | 0 | -2.861725  | -1.989346 | 0.023721  |
| 13  | 1    | 0    | 10.95228                | -1.461938 | 0.88317   | 41 | 6 | 0 | -0.994843  | -0.926418 | 0.020994  |
| 14  | 6    | 0    | 10.132382               | 0.328048  | -0.005476 | 42 | 1 | 0 | -0.389878  | -1.827575 | 0.027615  |
| 15  | 1    | 0    | 10.298593               | 0.964104  | 0.872883  | 43 | 6 | 0 | -4.595211  | 0.053538  | 0.005594  |
| 16  | 1    | 0    | 10.289615               | 0.952636  | -0.893665 | 44 | 6 | 0 | -5.806093  | -0.02464  | 0.000714  |
| 17  | 6    | 0    | 8.696734                | -0.158866 | 0.00476   | 45 | 6 | 0 | -7.235293  | -0.114709 | -0.006828 |
| 18  | 1    | 0    | 8.487417                | -0.772967 | -0.881487 | 46 | 6 | 0 | -8.016836  | 1.053362  | -0.018708 |
| 19  | 1    | 0    | 8.495828                | -0.761118 | 0.901043  | 47 | 1 | 0 | -7.530512  | 2.023263  | -0.021364 |
| 20  | 8    | 0    | 7.84517                 | 0.984966  | 0.001105  | 48 | 6 | 0 | -9.401926  | 0.964979  | -0.030466 |
| 21  | 6    | 0    | 6.504584                | 0.790297  | 0.005638  | 49 | 1 | 0 | -10.004404 | 1.868365  | -0.043073 |
| 22  | 6    | 0    | 5.716891                | 1.951613  | -0.000935 | 50 | 6 | 0 | -10.014846 | -0.289513 | -0.030788 |
| 23  | 1    | 0    | 6.212357                | 2.917473  | -0.008803 | 51 | 6 | 0 | -9.252721  | -1.455906 | -0.016571 |
| 24  | 6    | 0    | 4.3365                  | 1.857827  | 0.002229  | 52 | 1 | 0 | -9.735964  | -2.427175 | -0.018391 |
| 25  | 1    | 0    | 3.732066                | 2.759767  | -0.00317  | 53 | 6 | 0 | -7.864903  | -1.368809 | -0.005787 |
| 26  | 6    | 0    | 3.703796                | 0.59978   | 0.012084  | 54 | 1 | 0 | -7.261828  | -2.27073  | 0.001431  |
| 27  | 6    | 0    | 4.500177                | -0.552264 | 0.019078  | 55 | 6 | 0 | -11.513973 | -0.358977 | -0.007271 |
| 28  | 1    | 0    | 4.025715                | -1.528921 | 0.02686   | 56 | 9 | 0 | -12.073048 | 0.519044  | -0.862481 |
|     |      |      |                         |           |           | 57 | 9 | 0 | -12.012594 | -0.064364 | 1.212726  |
|     |      |      |                         |           |           | 58 | 9 | 0 | -11.980248 | -1.576598 | -0.330072 |

**Table S7.** Cartesian Coordinates of **2a** (S<sub>1</sub> state)

| No. | Atom | Type | Coordinates (Angstroms) |           |           |    |   |   |            |           |           |
|-----|------|------|-------------------------|-----------|-----------|----|---|---|------------|-----------|-----------|
|     | No.  |      | x                       | y         | z         |    |   |   |            |           |           |
| 1   | 6    | 0    | 15.005227               | -0.997848 | -0.034327 | 29 | 6 | 0 | 5.853488   | -0.496229 | 0.02027   |
| 2   | 1    | 0    | 15.199298               | -0.392426 | -0.926951 | 30 | 1 | 0 | 6.442425   | -1.405638 | 0.026914  |
| 3   | 1    | 0    | 15.715808               | -1.830301 | -0.031725 | 31 | 6 | 0 | 2.276574   | 0.497035  | 0.019889  |
| 4   | 1    | 0    | 15.213576               | -0.374712 | 0.842761  | 32 | 6 | 0 | 1.039384   | 0.417521  | 0.021299  |
| 5   | 6    | 0    | 13.56035                | -1.493284 | -0.017721 | 33 | 6 | 0 | -0.336935  | 0.329317  | 0.021048  |
| 6   | 1    | 0    | 13.379992               | -2.136196 | -0.889532 | 34 | 6 | 0 | -1.154819  | 1.516008  | 0.009767  |
| 7   | 1    | 0    | 13.394197               | -2.118685 | 0.8695    | 35 | 1 | 0 | -0.665531  | 2.485099  | 0.00299   |
| 8   | 6    | 0    | 12.548753               | -0.348282 | -0.020986 | 36 | 6 | 0 | -2.516392  | 1.427471  | 0.007049  |
| 9   | 1    | 0    | 12.713082               | 0.278716  | -0.908964 | 37 | 1 | 0 | -3.125597  | 2.326024  | -0.001908 |
| 10  | 1    | 0    | 12.726782               | 0.295894  | 0.85194   | 38 | 6 | 0 | -3.17546   | 0.147794  | 0.015335  |
| 11  | 6    | 0    | 11.09934                | -0.831226 | -0.005111 | 39 | 6 | 0 | -2.358824  | -1.037533 | 0.028077  |
| 12  | 1    | 0    | 10.922351               | -1.474267 | -0.878559 | 40 | 1 | 0 | -2.848453  | -2.006467 | 0.035053  |
| 13  | 1    | 0    | 10.935828               | -1.457221 | 0.883199  | 41 | 6 | 0 | -0.997064  | -0.951843 | 0.030853  |
| 14  | 6    | 0    | 10.097063               | 0.322647  | -0.008676 | 42 | 1 | 0 | -0.388191  | -1.850596 | 0.040035  |
| 15  | 1    | 0    | 10.257718               | 0.961831  | 0.868214  | 43 | 6 | 0 | -4.556515  | 0.059516  | 0.009934  |
| 16  | 1    | 0    | 10.246015               | 0.946087  | -0.898864 | 44 | 6 | 0 | -5.789705  | -0.019875 | 0.003636  |
| 17  | 6    | 0    | 8.667982                | -0.181203 | 0.005009  | 45 | 6 | 0 | -7.186622  | -0.108824 | -0.006273 |
| 18  | 1    | 0    | 8.459166                | -0.795122 | -0.880471 | 46 | 6 | 0 | -7.988704  | 1.065683  | -0.023119 |
| 19  | 1    | 0    | 8.470258                | -0.779159 | 0.903862  | 47 | 1 | 0 | -7.505369  | 2.037301  | -0.027131 |
| 20  | 8    | 0    | 7.801977                | 0.957998  | 0.000179  | 48 | 6 | 0 | -9.367078  | 0.971514  | -0.037778 |
| 21  | 6    | 0    | 6.473676                | 0.768474  | 0.006787  | 49 | 1 | 0 | -9.970881  | 1.874475  | -0.053525 |
| 22  | 6    | 0    | 5.686852                | 1.941685  | -0.000952 | 50 | 6 | 0 | -9.986711  | -0.286776 | -0.037222 |
| 23  | 1    | 0    | 6.192424                | 2.902099  | -0.011066 | 51 | 6 | 0 | -9.216186  | -1.455135 | -0.016757 |
| 24  | 6    | 0    | 4.315662                | 1.858504  | 0.003824  | 52 | 1 | 0 | -9.699758  | -2.426731 | -0.016347 |
| 25  | 1    | 0    | 3.711948                | 2.760453  | -0.002456 | 53 | 6 | 0 | -7.834639  | -1.373149 | -0.00299  |
| 26  | 6    | 0    | 3.664384                | 0.58829   | 0.01663   | 54 | 1 | 0 | -7.233331  | -2.27642  | 0.008301  |
| 27  | 6    | 0    | 4.474188                | -0.580876 | 0.025069  | 55 | 6 | 0 | -11.479429 | -0.356035 | -0.013106 |
| 28  | 1    | 0    | 3.993204                | -1.553898 | 0.035194  | 56 | 9 | 0 | -12.045577 | 0.522584  | -0.86745  |
|     |      |      |                         |           |           | 57 | 9 | 0 | -11.989865 | -0.060572 | 1.206422  |
|     |      |      |                         |           |           | 58 | 9 | 0 | -11.948982 | -1.574698 | -0.334376 |



Compound **2b** (R = *cyclo*-C<sub>6</sub>H<sub>7</sub>F<sub>4</sub>)

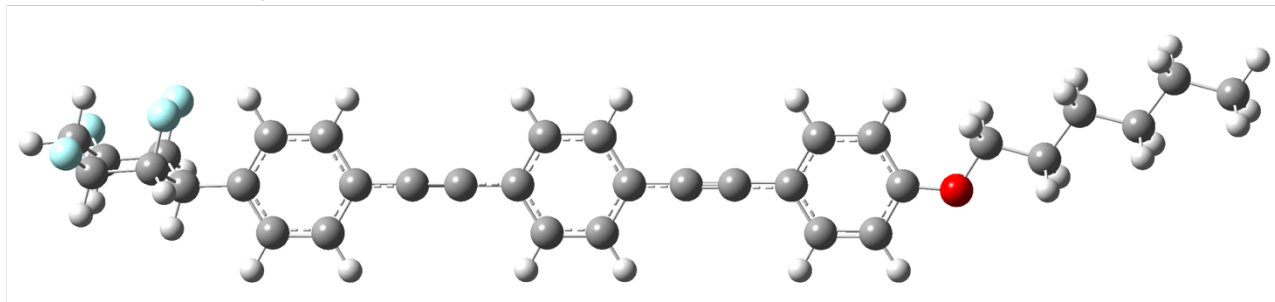

SCF Done: E(RM062X) = -1788.73140181 A.U. after 7 cycles

Dipole moment (field-independent basis, Debye):

X= -2.4454 Y= -4.1108 Z= -0.7287 Tot= 4.8384

**TD-SCF approximation (Energy calculation)** at M06-2X/6-31+G(d) with CPCM (CH<sub>2</sub>Cl<sub>2</sub>)

Excited State 1: Singlet-A 3.7460 eV 330.97 nm f=2.5521 <S\*\*2>=0.000

139 ->142 -0.13050

140 ->141 0.67335

**TD-SCF approximation (Optimization calculation)** at M06-2X/6-31+G(d) with CPCM (CH<sub>2</sub>Cl<sub>2</sub>)

Excited State 1: Singlet-A 3.0128 eV 411.53 nm f=2.7099 <S\*\*2>=0.000

139 ->142 -0.11190

140 ->141 0.68808

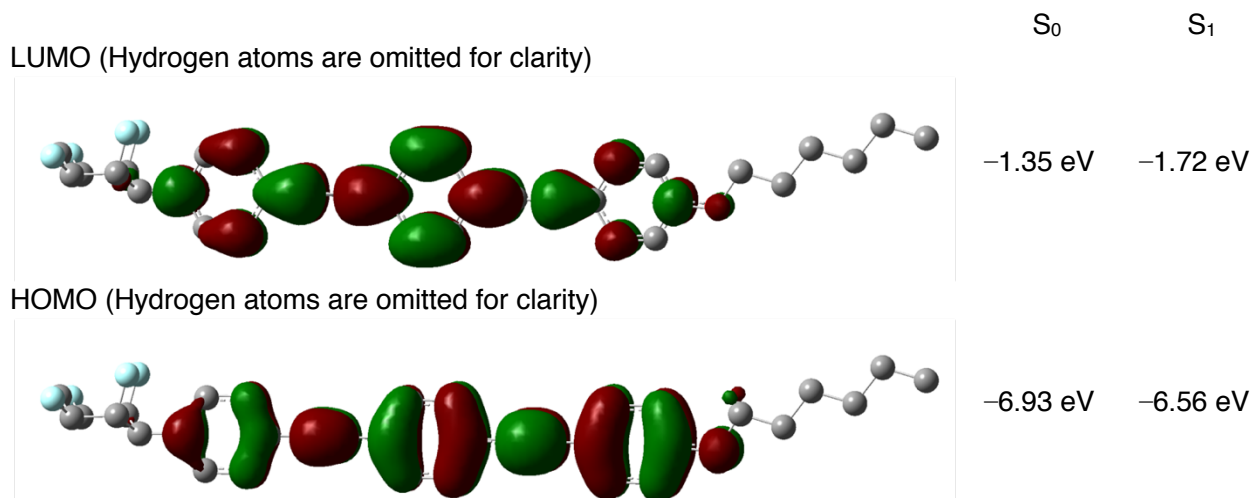

**Figure S19.** HOMO and LUMO of **2b** and their orbital energies (eV). Computed with M06-2X/6-31+G(d).

**Table S8.** Cartesian Coordinates of **2b** (S<sub>0</sub> state)

| No. | Atom | Type | Coordinates (Angstroms) |           |           | 36 | 1 | 0 | 0.694297  | 1.586809  | 0.217916  |
|-----|------|------|-------------------------|-----------|-----------|----|---|---|-----------|-----------|-----------|
|     | No.  | x    | y                       | z         | 37        |    |   |   |           |           |           |
| 1   | 6    | 0    | -17.229632              | 1.454061  | -0.003392 | 38 | 6 | 0 | 0.209707  | -1.768783 | -0.111815 |
| 2   | 1    | 0    | -17.447495              | 0.905531  | -0.926798 | 39 | 1 | 0 | 0.770969  | -2.693104 | -0.206639 |
| 3   | 1    | 0    | -17.896233              | 2.321201  | 0.037703  | 40 | 6 | 0 | -1.1774   | -1.79407  | -0.106821 |
| 4   | 1    | 0    | -17.477096              | 0.798969  | 0.839609  | 41 | 1 | 0 | -1.705096 | -2.7383   | -0.197766 |
| 5   | 6    | 0    | -15.761153              | 1.871866  | 0.046526  | 42 | 6 | 0 | -1.911105 | -0.601321 | 0.014231  |
| 6   | 1    | 0    | -15.56996               | 2.441368  | 0.965809  | 43 | 6 | 0 | 2.330619  | -0.523051 | -0.005132 |
| 7   | 1    | 0    | -15.540828              | 2.548516  | -0.789873 | 44 | 6 | 0 | 3.544157  | -0.498601 | -0.016286 |
| 8   | 6    | 0    | -14.810128              | 0.677488  | -0.010755 | 45 | 6 | 0 | 4.976489  | -0.470342 | -0.032091 |
| 9   | 1    | 0    | -15.030086              | -0.002044 | 0.825087  | 46 | 6 | 0 | 5.667095  | 0.743284  | 0.114002  |
| 10  | 1    | 0    | -14.998287              | 0.107905  | -0.932158 | 47 | 1 | 0 | 5.105924  | 1.663988  | 0.241078  |
| 11  | 6    | 0    | -13.337511              | 1.081191  | 0.04123   | 48 | 6 | 0 | 7.057065  | 0.772242  | 0.096557  |
| 12  | 1    | 0    | -13.149219              | 1.645731  | 0.965235  | 49 | 1 | 0 | 7.572099  | 1.719003  | 0.21074   |
| 13  | 1    | 0    | -13.119511              | 1.76348   | -0.024117 | 50 | 6 | 0 | 7.792628  | -0.409596 | -0.06817  |
| 14  | 6    | 0    | -12.396771              | -0.121314 | -0.024117 | 51 | 6 | 0 | 7.099648  | -1.616858 | -0.212614 |
| 15  | 1    | 0    | -12.602391              | -0.80403  | 0.809784  | 52 | 1 | 0 | 7.65406   | -2.543186 | -0.341029 |
| 16  | 1    | 0    | -12.568474              | -0.680806 | -0.952143 | 53 | 6 | 0 | 5.70986   | -1.654882 | -0.195479 |
| 17  | 6    | 0    | -10.941454              | 0.299633  | 0.032684  | 54 | 1 | 0 | 5.186529  | -2.599211 | -0.309071 |
| 18  | 1    | 0    | -10.694939              | 0.964089  | -0.806532 | 55 | 6 | 0 | 9.307375  | -0.415902 | -0.093969 |
| 19  | 1    | 0    | -10.724646              | 0.828343  | 0.970687  | 56 | 6 | 0 | 9.89237   | 0.367069  | -1.277275 |
| 20  | 8    | 0    | -10.141663              | -0.878303 | -0.044472 | 57 | 9 | 0 | 9.533866  | 1.711702  | -1.191376 |
| 21  | 6    | 0    | -8.793664               | -0.745407 | -0.021866 | 58 | 6 | 0 | 11.411146 | 0.293309  | -1.278641 |
| 22  | 6    | 0    | -8.123362               | 0.47814   | 0.085396  | 59 | 9 | 0 | 11.889651 | 1.072343  | -2.328207 |
| 23  | 1    | 0    | -8.667426               | 1.41225   | 0.159679  | 60 | 6 | 0 | 12.002059 | 0.795714  | 0.028957  |
| 24  | 6    | 0    | -6.73046                | 0.499273  | 0.097044  | 61 | 6 | 0 | 11.450964 | -0.044362 | 1.170016  |
| 25  | 1    | 0    | -6.212247               | 1.449899  | 0.179707  | 62 | 9 | 0 | 11.966253 | 0.423965  | 2.375177  |
| 26  | 6    | 0    | -5.987002               | -0.683911 | 0.003062  | 63 | 6 | 0 | 9.933184  | 0.019806  | 1.237869  |
| 27  | 6    | 0    | -6.676229               | -1.90741  | -0.102724 | 64 | 9 | 0 | 9.577502  | 1.335564  | 1.531027  |
| 28  | 1    | 0    | -6.113506               | -2.833081 | -0.176192 | 65 | 1 | 0 | 9.625752  | -1.457271 | -0.242371 |
| 29  | 6    | 0    | -8.05944                | -1.937572 | -0.114812 | 66 | 1 | 0 | 9.557822  | -0.598755 | 2.058512  |
| 30  | 1    | 0    | -8.598205               | -2.876441 | -0.196949 | 67 | 1 | 0 | 13.091985 | 0.718831  | 0.000744  |
| 31  | 6    | 0    | -4.556119               | -0.651895 | 0.011147  | 68 | 1 | 0 | 11.724937 | 1.844349  | 0.177955  |
| 32  | 6    | 0    | -3.341943               | -0.628027 | 0.014619  | 69 | 1 | 0 | 9.487771  | -0.007318 | -2.222285 |
| 33  | 6    | 0    | -1.220648               | 0.617277  | 0.132109  | 70 | 1 | 0 | 11.716847 | -0.739329 | -1.483049 |
| 34  | 1    | 0    | -1.781751               | 1.54171   | 0.226339  | 71 | 1 | 0 | 11.758647 | -1.092415 | 1.077053  |
| 35  | 6    | 0    | 0.166495                | 0.642564  | 0.127405  |    |   |   |           |           |           |

**Table S9.** Cartesian Coordinates of **2b** (S<sub>1</sub> state)

| No. | Atom | Type | Coordinates (Angstroms) |           |           | 36 | 1 | 0 | -0.686236  | -1.609879 | 0.241844  |
|-----|------|------|-------------------------|-----------|-----------|----|---|---|------------|-----------|-----------|
|     | No.  | x    | y                       | z         | 37        |    |   |   |            |           |           |
| 1   | 6    | 0    | 17.205562               | -1.412732 | -0.028012 | 38 | 6 | 0 | -0.195735  | 1.787296  | -0.101424 |
| 2   | 1    | 0    | 17.411473               | -0.876154 | -0.961113 | 39 | 1 | 0 | -0.762028  | 2.708688  | -0.197809 |
| 3   | 1    | 0    | 17.880354               | -2.273068 | 0.020969  | 40 | 6 | 0 | 1.168513   | 1.813497  | -0.096087 |
| 4   | 1    | 0    | 17.453187               | -0.742926 | 0.803271  | 41 | 1 | 0 | 1.701474   | 2.754943  | -0.188111 |
| 5   | 6    | 0    | 15.741457               | -1.843225 | 0.039191  | 42 | 6 | 0 | 1.932641   | 0.596752  | 0.029318  |
| 6   | 1    | 0    | 15.562406               | -2.400842 | 0.968129  | 43 | 6 | 0 | -2.298908  | 0.520241  | 0.008023  |
| 7   | 1    | 0    | 15.521108               | -2.533931 | -0.785592 | 44 | 6 | 0 | -3.534235  | 0.496548  | -0.004643 |
| 8   | 6    | 0    | 14.779317               | -0.658312 | -0.028251 | 45 | 6 | 0 | -4.935632  | 0.470571  | -0.022483 |
| 9   | 1    | 0    | 14.998699               | 0.034875  | 0.796381  | 46 | 6 | 0 | -5.644213  | -0.752803 | 0.103995  |
| 10  | 1    | 0    | 14.955695               | -0.100278 | -0.958954 | 47 | 1 | 0 | -5.085295  | -1.67671  | 0.217818  |
| 11  | 6    | 0    | 13.310962               | -1.074988 | 0.039783  | 48 | 6 | 0 | -7.02855   | -0.77558  | 0.083432  |
| 12  | 1    | 0    | 13.1342                 | -1.628236 | 0.972757  | 49 | 1 | 0 | -7.546121  | -1.723025 | 0.182151  |
| 13  | 1    | 0    | 13.093275               | -1.770243 | -0.782998 | 50 | 6 | 0 | -7.76794   | 0.412116  | -0.064788 |
| 14  | 6    | 0    | 12.359723               | 0.118881  | -0.035327 | 51 | 6 | 0 | -7.069049  | 1.623941  | -0.188994 |
| 15  | 1    | 0    | 12.563718               | 0.813649  | 0.788737  | 52 | 1 | 0 | -7.624522  | 2.551858  | -0.303806 |
| 16  | 1    | 0    | 12.520404               | 0.66737   | -0.971682 | 53 | 6 | 0 | -5.685058  | 1.665764  | -0.16912  |
| 17  | 6    | 0    | 10.909768               | -0.316368 | 0.035728  | 54 | 1 | 0 | -5.162504  | 2.612359  | -0.266957 |
| 18  | 1    | 0    | 10.661134               | -0.990399 | -0.794343 | 55 | 6 | 0 | -9.280288  | 0.420138  | -0.092723 |
| 19  | 1    | 0    | 10.69974                | -0.831136 | 0.982244  | 56 | 6 | 0 | -9.867481  | -0.350707 | -1.284209 |
| 20  | 8    | 0    | 10.096626               | 0.856391  | -0.052304 | 57 | 9 | 0 | -9.511076  | -1.696803 | -1.211768 |
| 21  | 6    | 0    | 8.759076                | 0.726707  | -0.022865 | 58 | 6 | 0 | -11.386194 | -0.275172 | -1.286148 |
| 22  | 6    | 0    | 8.083594                | -0.502158 | 0.102398  | 59 | 9 | 0 | -11.865149 | -1.042306 | -2.344579 |
| 23  | 1    | 0    | 8.631461                | -1.433363 | 0.186087  | 60 | 6 | 0 | -11.979119 | -0.790552 | 0.01532   |
| 24  | 6    | 0    | 6.701118                | -0.525018 | 0.119168  | 61 | 6 | 0 | -11.428199 | 0.037463  | 1.165075  |
| 25  | 1    | 0    | 6.178813                | -1.471819 | 0.214857  | 62 | 9 | 0 | -11.945618 | -0.442201 | 2.365155  |
| 26  | 6    | 0    | 5.942189                | 0.673021  | 0.011463  | 63 | 6 | 0 | -9.910516  | -0.028341 | 1.233972  |
| 27  | 6    | 0    | 6.650167                | 1.906557  | -0.111783 | 64 | 9 | 0 | -9.556104  | -1.347157 | 1.51485   |
| 28  | 1    | 0    | 6.087752                | 2.831308  | -0.194084 | 65 | 1 | 0 | -9.59772   | 1.463338  | -0.231268 |
| 29  | 6    | 0    | 8.024268                | 1.927726  | -0.127858 | 66 | 1 | 0 | -9.536017  | 0.582011  | 2.061075  |
| 30  | 1    | 0    | 8.570901                | 2.860833  | -0.222275 | 67 | 1 | 0 | -13.068966 | -0.712322 | -0.013201 |
| 31  | 6    | 0    | 4.551252                | 0.644528  | 0.022632  | 68 | 1 | 0 | -11.703064 | -1.840907 | 0.153849  |
| 32  | 6    | 0    | 3.311107                | 0.621469  | 0.027595  | 69 | 1 | 0 | -9.46185   | 0.032646  | -2.225116 |
| 33  | 6    | 0    | 1.21172                 | -0.64621  | 0.153219  | 70 | 1 | 0 | -11.690349 | 0.759982  | -1.479892 |
| 34  | 1    | 0    | 1.777321                | -1.567931 | 0.249867  | 71 | 1 | 0 | -11.734887 | 1.08667   | 1.082214  |
| 35  | 6    | 0    | -0.15261                | -0.668867 | 0.148703  |    |   |   |            |           |           |

Compound **2c** (R = *cyclo*-C<sub>6</sub>F<sub>11</sub>)

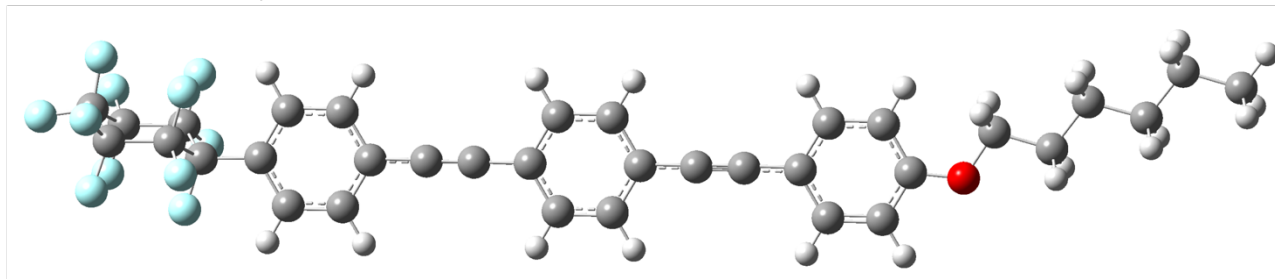

SCF Done: E(RM062X) = -2483.21281812 A.U. after 15 cycles

Dipole moment (field-independent basis, Debye):

X= 6.5726 Y= -1.5297 Z= -0.1280 Tot= 6.7494

**TD-SCF approximation (Energy calculation)** at M06-2X/6-31+G(d) with CPCM (CH<sub>2</sub>Cl<sub>2</sub>)

Excited State 1: Singlet-A 3.7060 eV 334.55 nm f=2.5054 <S\*\*2>=0.000

167 ->169 -0.15147

167 ->170 -0.10587

168 ->169 0.65782

168 ->170 -0.14135

**TD-SCF approximation (Optimization calculation)** at M06-2X/6-31+G(d) with CPCM (CH<sub>2</sub>Cl<sub>2</sub>)

Excited State 1: Singlet-A 2.9696 eV 417.51 nm f=2.6890 <S\*\*2>=0.000

167 ->170 -0.10222

168 ->169 0.68182

LUMO (Hydrogen atoms are omitted for clarity)

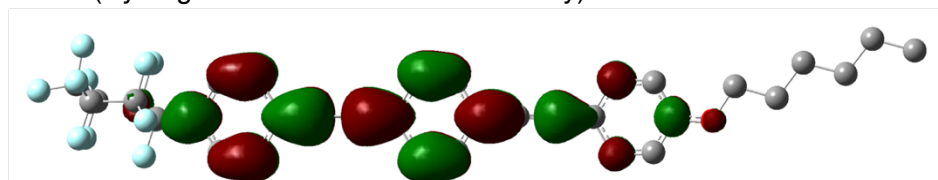

HOMO (Hydrogen atoms are omitted for clarity)

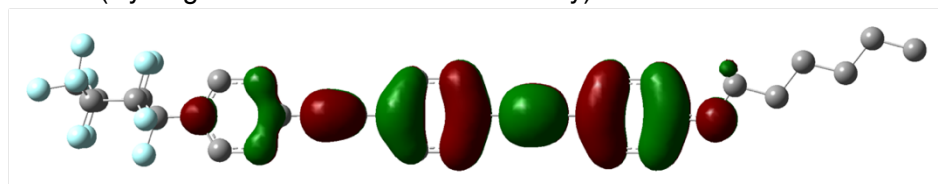

S<sub>0</sub>

S<sub>1</sub>

-1.52 eV

-1.88 eV

-7.00 eV

-6.64 eV

**Figure S20.** HOMO and LUMO of **2b** and their orbital energies (eV). Computed with M06-2X/6-31+G(d).

**Table S10.** Cartesian Coordinates of **2c** ( $S_0$  state)

| No. | Atom | Type | Coordinates (Angstroms) |           |           |    |   |   |            |           |           |
|-----|------|------|-------------------------|-----------|-----------|----|---|---|------------|-----------|-----------|
|     | No.  |      | x                       | y         | z         |    |   |   |            |           |           |
| 1   | 6    | 0    | 19.086837               | -1.411039 | 0.038264  | 36 | 1 | 0 | 1.157236   | -1.645895 | -0.25453  |
| 2   | 1    | 0    | 19.335285               | -0.738865 | -0.790877 | 37 | 6 | 0 | 0.946636   | 0.491729  | -0.052943 |
| 3   | 1    | 0    | 19.760203               | -2.272336 | -0.013845 | 38 | 6 | 0 | 1.631118   | 1.7135    | 0.147982  |
| 4   | 1    | 0    | 19.294061               | -0.87787  | 0.973043  | 39 | 1 | 0 | 1.066427   | 2.636445  | 0.147982  |
| 5   | 6    | 0    | 17.621913               | -1.838655 | -0.029757 | 40 | 6 | 0 | 3.017989   | 1.742404  | 0.063978  |
| 6   | 1    | 0    | 17.400653               | -2.531639 | 0.792896  | 41 | 1 | 0 | 3.542874   | 2.688263  | 0.153389  |
| 7   | 1    | 0    | 17.441566               | -2.39308  | -0.960379 | 42 | 6 | 0 | 3.755147   | 0.550661  | -0.046818 |
| 8   | 6    | 0    | 16.661697               | -0.652413 | 0.041702  | 43 | 6 | 0 | -0.484251  | 0.461632  | -0.050242 |
| 9   | 1    | 0    | 16.839664               | -0.097351 | 0.973929  | 44 | 6 | 0 | -1.697381  | 0.436663  | -0.043889 |
| 10  | 1    | 0    | 16.882037               | 0.042902  | -0.780942 | 45 | 6 | 0 | -3.128741  | 0.410083  | -0.030958 |
| 11  | 6    | 0    | 15.192443               | -1.065807 | -0.026808 | 46 | 6 | 0 | -3.818291  | -0.808554 | -0.126739 |
| 12  | 1    | 0    | 14.973736               | -1.762597 | 0.794507  | 47 | 1 | 0 | -3.260548  | -1.735148 | -0.213894 |
| 13  | 1    | 0    | 15.014527               | -1.61707  | -0.960828 | 48 | 6 | 0 | -5.206744  | -0.837228 | -0.10909  |
| 14  | 6    | 0    | 14.242747               | 0.128921  | 0.050721  | 49 | 1 | 0 | -5.711513  | -1.792821 | -0.182544 |
| 15  | 1    | 0    | 14.405457               | 0.676206  | 0.987609  | 50 | 6 | 0 | -5.928247  | 0.35733   | 0.004313  |
| 16  | 1    | 0    | 14.447983               | 0.824972  | -0.772158 | 51 | 6 | 0 | -5.24891   | 1.57473   | 0.098477  |
| 17  | 6    | 0    | 12.790736               | -0.301229 | -0.020094 | 52 | 1 | 0 | -5.799724  | 2.503754  | 0.18672   |
| 18  | 1    | 0    | 12.582932               | -0.81933  | -0.966014 | 53 | 6 | 0 | -3.859763  | 1.601635  | 0.080935  |
| 19  | 1    | 0    | 12.543821               | -0.977831 | 0.809202  | 54 | 1 | 0 | -3.335389  | 2.548647  | 0.15536   |
| 20  | 8    | 0    | 11.982607               | 0.870394  | 0.067118  | 55 | 9 | 0 | -7.897474  | 1.673142  | 0.146678  |
| 21  | 6    | 0    | 10.635844               | 0.729472  | 0.034412  | 56 | 6 | 0 | -7.443232  | 0.377217  | 0.034765  |
| 22  | 6    | 0    | 9.973756                | -0.496976 | -0.090078 | 57 | 6 | 0 | -8.084716  | -0.155916 | -1.270271 |
| 23  | 1    | 0    | 10.52405                | -1.426885 | -0.170815 | 58 | 9 | 0 | -7.685672  | -1.425825 | -1.491986 |
| 24  | 6    | 0    | 8.581158                | -0.526383 | -0.110774 | 59 | 9 | 0 | -7.685147  | 0.608335  | -2.29906  |
| 25  | 1    | 0    | 8.069195                | -1.479136 | -0.206698 | 60 | 6 | 0 | -9.63346   | -0.162295 | -1.250961 |
| 26  | 6    | 0    | 7.830102                | 0.651365  | -0.009184 | 61 | 9 | 0 | -10.076732 | -0.796748 | -2.347936 |
| 27  | 6    | 0    | 8.51104                 | 1.877921  | 0.113853  | 62 | 9 | 0 | -10.08747  | 1.102003  | -1.269682 |
| 28  | 1    | 0    | 7.942166                | 2.79931   | 0.193345  | 63 | 6 | 0 | -10.206243 | -0.873321 | -0.004781 |
| 29  | 6    | 0    | 9.89384                 | 1.916241  | 0.13525   | 64 | 9 | 0 | -9.955285  | -2.190645 | -0.114712 |
| 30  | 1    | 0    | 10.426431               | 2.857357  | 0.230668  | 65 | 9 | 0 | -11.532272 | -0.682462 | 0.038099  |
| 31  | 6    | 0    | 6.399651                | 0.611358  | -0.026861 | 66 | 6 | 0 | -9.578693  | -0.366611 | 1.312683  |
| 32  | 6    | 0    | 5.185675                | 0.581946  | -0.038349 | 67 | 9 | 0 | -9.976113  | -1.168454 | 2.313437  |
| 33  | 6    | 0    | 3.06924                 | -0.670767 | -0.162839 | 68 | 9 | 0 | -10.02691  | 0.877214  | 1.55122   |
| 34  | 1    | 0    | 3.633669                | -1.593855 | -0.24926  | 69 | 6 | 0 | -8.030714  | -0.357708 | 1.265378  |
| 35  | 6    | 0    | 1.682258                | -0.699974 | -0.165829 | 70 | 9 | 0 | -7.625938  | -1.645139 | 1.265213  |
|     |      |      |                         |           |           | 71 | 9 | 0 | -7.584355  | 0.235369  | 2.383928  |

**Table S11.** Cartesian Coordinates of **2c** ( $S_1$  state)

| No. | Atom | Type | Coordinates (Angstroms) |           |           |    |   |   |            |           |           |
|-----|------|------|-------------------------|-----------|-----------|----|---|---|------------|-----------|-----------|
|     | No.  |      | x                       | y         | z         |    |   |   |            |           |           |
| 1   | 6    | 0    | 19.053437               | -1.379291 | 0.027372  | 36 | 1 | 0 | 1.163817   | -1.658536 | -0.260269 |
| 2   | 1    | 0    | 19.296049               | -0.698067 | -0.796067 | 37 | 6 | 0 | 0.92982    | 0.497522  | -0.048642 |
| 3   | 1    | 0    | 19.733921               | -2.234448 | -0.032185 | 38 | 6 | 0 | 1.643281   | 1.741987  | 0.07069   |
| 4   | 1    | 0    | 19.256345               | -0.852441 | 0.966645  | 39 | 1 | 0 | 1.073439   | 2.661746  | 0.159845  |
| 5   | 6    | 0    | 17.592211               | -1.818763 | -0.044118 | 40 | 6 | 0 | 3.007421   | 1.77151   | 0.073766  |
| 6   | 1    | 0    | 17.376826               | -2.520233 | 0.772845  | 41 | 1 | 0 | 3.538055   | 2.714201  | 0.165287  |
| 7   | 1    | 0    | 17.416424               | -2.366916 | -0.979286 | 42 | 6 | 0 | 3.773277   | 0.556346  | -0.042474 |
| 8   | 6    | 0    | 16.622328               | -0.641042 | 0.037093  | 43 | 6 | 0 | -0.453542  | 0.468773  | -0.045387 |
| 9   | 1    | 0    | 16.795794               | -0.092004 | 0.973657  | 44 | 6 | 0 | -1.689165  | 0.443677  | -0.038891 |
| 10  | 1    | 0    | 16.836365               | 0.062455  | -0.780165 | 45 | 6 | 0 | -3.088005  | 0.417335  | -0.025901 |
| 11  | 6    | 0    | 15.156736               | -1.066806 | -0.034287 | 46 | 6 | 0 | -3.796367  | -0.808989 | -0.136548 |
| 12  | 1    | 0    | 14.943838               | -1.770846 | 0.782225  | 47 | 1 | 0 | -3.240306  | -1.735705 | -0.235127 |
| 13  | 1    | 0    | 14.983262               | -1.612609 | -0.972226 | 48 | 6 | 0 | -5.178423  | -0.833611 | -0.118419 |
| 14  | 6    | 0    | 14.197964               | 0.120334  | 0.05168   | 49 | 1 | 0 | -5.683424  | -1.788602 | -0.203474 |
| 15  | 1    | 0    | 14.355975               | 0.662259  | 0.992259  | 50 | 6 | 0 | -5.908678  | 0.361841  | 0.009998  |
| 16  | 1    | 0    | 14.396395               | 0.822876  | -0.767078 | 51 | 6 | 0 | -5.222347  | 1.581602  | 0.118374  |
| 17  | 6    | 0    | 12.751091               | -0.324216 | -0.021616 | 52 | 1 | 0 | -5.774727  | 2.509088  | 0.21774   |
| 18  | 1    | 0    | 12.543565               | -0.834314 | -0.970975 | 53 | 6 | 0 | -3.839838  | 1.614988  | 0.100994  |
| 19  | 1    | 0    | 12.505971               | -1.003265 | 0.805116  | 54 | 1 | 0 | -3.31851   | 2.563004  | 0.186232  |
| 20  | 8    | 0    | 11.930125               | 0.84401   | 0.0724    | 55 | 9 | 0 | -7.87767   | 1.673232  | 0.17148   |
| 21  | 6    | 0    | 10.595646               | 0.709835  | 0.038986  | 56 | 6 | 0 | -7.418333  | 0.37934   | 0.041264  |
| 22  | 6    | 0    | 9.92551                 | -0.522327 | -0.091178 | 57 | 6 | 0 | -8.064324  | -0.136215 | -1.270687 |
| 23  | 1    | 0    | 10.47756                | -1.450891 | -0.175163 | 58 | 9 | 0 | -7.662417  | -1.402047 | -1.512417 |
| 24  | 6    | 0    | 8.543968                | -0.549644 | -0.11232  | 59 | 9 | 0 | -7.670098  | 0.643744  | -2.290187 |
| 25  | 1    | 0    | 8.024348                | -1.497456 | -0.211811 | 60 | 6 | 0 | -9.612737  | -0.14757  | -1.251217 |
| 26  | 6    | 0    | 7.781961                | 0.646236  | -0.004854 | 61 | 9 | 0 | -10.056578 | -0.766989 | -2.357242 |
| 27  | 6    | 0    | 8.483314                | 1.882711  | 0.123841  | 62 | 9 | 0 | -10.070873 | 1.115737  | -1.251508 |
| 28  | 1    | 0    | 7.91634                 | 2.804567  | 0.206252  | 63 | 6 | 0 | -10.183557 | -0.877612 | -0.015683 |
| 29  | 6    | 0    | 9.856617                | 1.909028  | 0.144801  | 64 | 9 | 0 | -9.929378  | -2.192819 | -0.143851 |
| 30  | 1    | 0    | 10.400329               | 2.843274  | 0.243239  | 65 | 9 | 0 | -11.510608 | -0.691661 | 0.029684  |
| 31  | 6    | 0    | 6.391498                | 0.61252   | -0.022109 | 66 | 6 | 0 | -9.557563  | -0.387191 | 1.308189  |
| 32  | 6    | 0    | 5.152269                | 0.585318  | -0.033546 | 67 | 9 | 0 | -9.955199  | -1.203228 | 2.298156  |
| 33  | 6    | 0    | 3.05892                 | -0.689107 | -0.165362 | 68 | 9 | 0 | -10.009821 | 0.852201  | 1.56326   |
| 34  | 1    | 0    | 3.62845                 | -1.609    | -0.254967 | 69 | 6 | 0 | -8.009901  | -0.373288 | 1.261463  |
| 35  | 6    | 0    | 1.694668                | -0.716003 | -0.168257 | 70 | 9 | 0 | -7.602828  | -1.660389 | 1.245536  |
|     |      |      |                         |           |           | 71 | 9 | 0 | -7.56809   | 0.204932  | 2.389996  |

## 4. Phase Transition Behavior

### 4.1.DSC and PXRD

The thermodynamic behavior was determined using a differential scanning calorimeter (DSC, SHIMADZU DSC-60 Plus; Kyoto, Japan) at heating and cooling rates of  $5.0\text{ }^{\circ}\text{C min}^{-1}$  under  $\text{N}_2$  atmosphere. Liquid crystalline structures were evaluated by an FR-E X-ray diffractometer attached with an R-axis IV two-dimensional (2D) detector (Rigaku, Tokyo, Japan).  $0.3\text{ mm}$  collimated  $\text{Cu K}\alpha$  radiation ( $\lambda = 1.54187\text{ \AA}$ ) was used as an X-ray beam, and the camera length was set at  $300\text{ mm}$ . The powder sample was loaded into a thin wall glass capillary tube for XRD analysis ( $\phi\text{ }1.0\text{--}2.5\text{ mm}$ , Hilgenberg GmbH), and the n annealed up to isotropic temperature under vacuum. The glass capillary was set onto a ceramic heater attached to the FR-E sample holder. Exposure time of the X-ray beam was  $5\text{--}60\text{ min}$ .

(a)

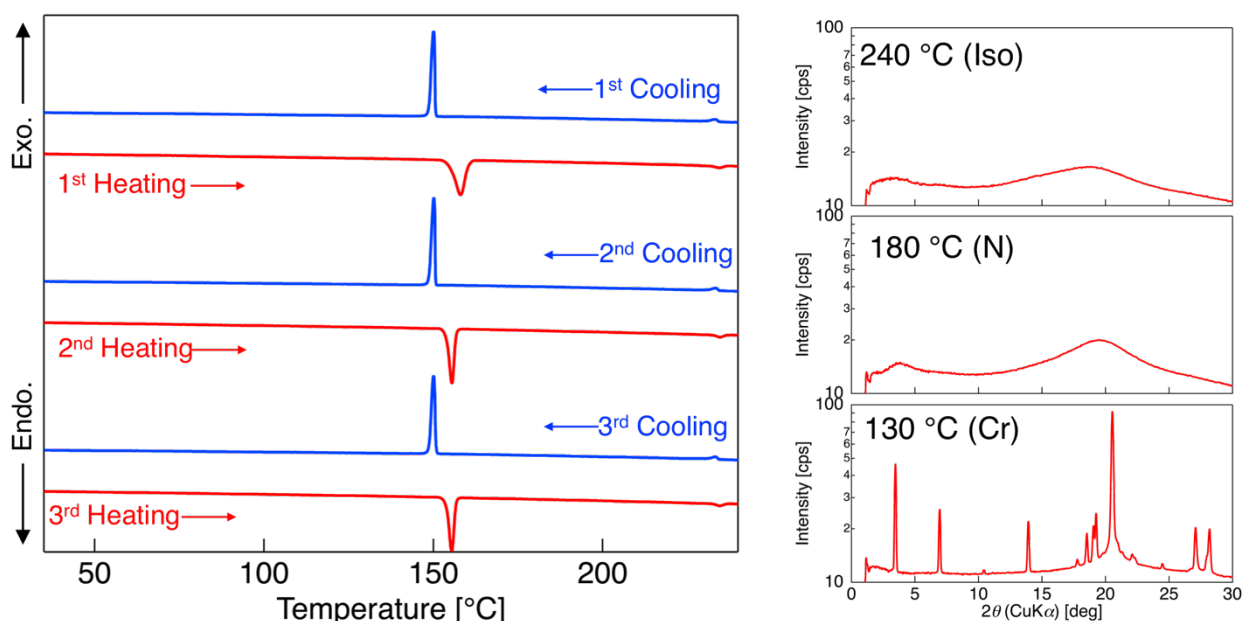

**Figure S21.** DSC thermogram of **1a** under  $\text{N}_2$  atmosphere (scan rate:  $5.0\text{ }^{\circ}\text{C min}^{-1}$ ) and PXRD pattern.

**Table S12.** Phase transition behavior of **1a** determined by DSC

|                         | Phase transition | Temperature<br>[ $^{\circ}\text{C}$ ] | Enthalpy ( $\Delta H$ )<br>[ $\text{kJ mol}^{-1}$ ] | Entropy ( $\Delta S$ )<br>[ $\text{J mol}^{-1}\text{ K}^{-1}$ ] |
|-------------------------|------------------|---------------------------------------|-----------------------------------------------------|-----------------------------------------------------------------|
| 1 <sup>st</sup> Heating | Cr–N             | 155                                   | 38.3                                                | 89.6                                                            |
|                         | N–Iso            | 232                                   | 1.91                                                | 3.77                                                            |
| 1 <sup>st</sup> Cooling | Cr–N             | 151                                   | –29.0                                               | –68.6                                                           |
|                         | N–Iso            | 234                                   | –1.56                                               | –3.09                                                           |
| 2 <sup>nd</sup> Heating | Cr–N             | 154                                   | 30.3                                                | 70.9                                                            |
|                         | N–Iso            | 233                                   | 1.64                                                | 3.26                                                            |
| 2 <sup>nd</sup> Cooling | Cr–N             | 151                                   | –28.8                                               | –68.0                                                           |
|                         | N–Iso            | 234                                   | –1.66                                               | –3.28                                                           |
| 3 <sup>rd</sup> Heating | Cr–N             | 154                                   | 29.8                                                | 69.8                                                            |
|                         | N–Iso            | 233                                   | 1.66                                                | 3.28                                                            |
| 3 <sup>rd</sup> Cooling | Cr–N             | 151                                   | –28.4                                               | –67.1                                                           |
|                         | N–Iso            | 234                                   | –1.44                                               | –2.85                                                           |

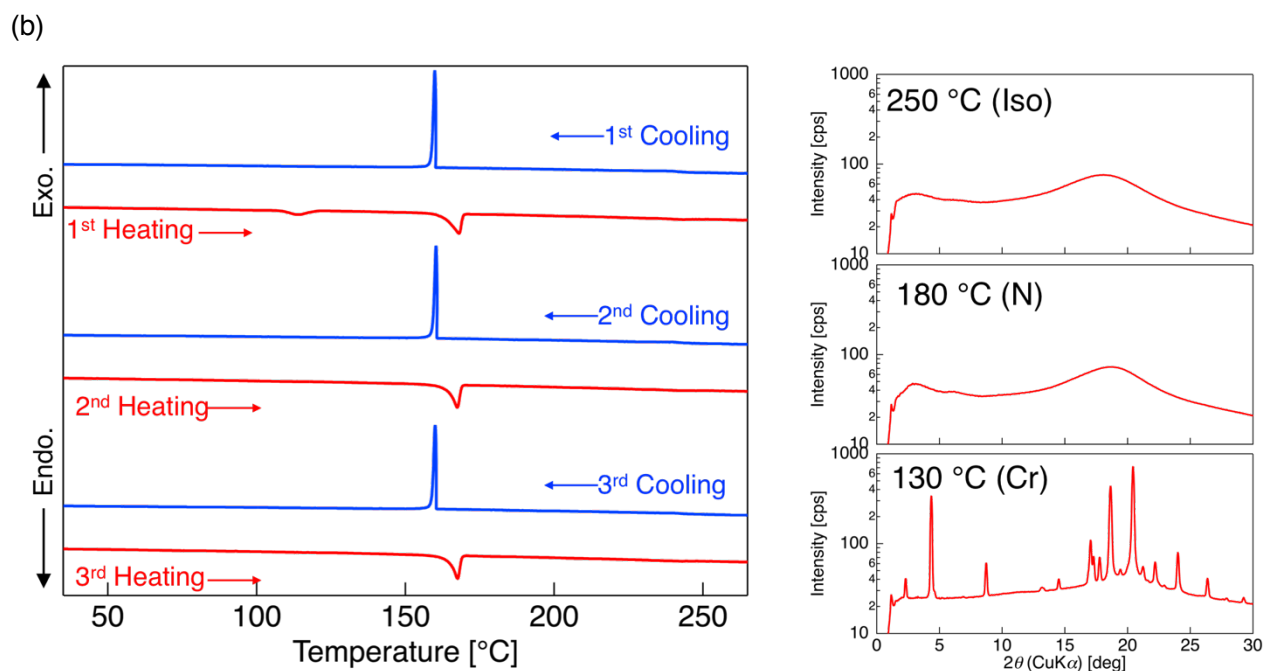

**Figure S22.** DSC thermogram of **1b** under N<sub>2</sub> atmosphere (scan rate: 5.0 °C min<sup>-1</sup>) and PXRD pattern.

**Table S13.** Phase transition behavior of **1b** determined by DSC

|                         | Phase transition | Temperature [°C] | Enthalpy ( $\Delta H$ ) [kJ mol <sup>-1</sup> ] | Entropy ( $\Delta S$ ) [J mol <sup>-1</sup> K <sup>-1</sup> ] |
|-------------------------|------------------|------------------|-------------------------------------------------|---------------------------------------------------------------|
| 1 <sup>st</sup> Heating | Cr1–Cr2          | 108              | 8.07                                            | 21.1                                                          |
|                         | Cr2–N            | 163              | 24.2                                            | 55.6                                                          |
|                         | N–Iso            | 239              | 1.30                                            | 2.54                                                          |
| 1 <sup>st</sup> Cooling | Cr–N             | 160              | –22.5                                           | –51.9                                                         |
|                         | N–Iso            | 242              | –1.00                                           | –1.94                                                         |
| 2 <sup>nd</sup> Heating | Cr–N             | 164              | 22.9                                            | 52.4                                                          |
|                         | N–Iso            | 239              | 2.48                                            | 4.84                                                          |
| 2 <sup>nd</sup> Cooling | Cr–N             | 160              | –21.9                                           | –50.6                                                         |
|                         | N–Iso            | 243              | –1.26                                           | –2.44                                                         |
| 3 <sup>rd</sup> Heating | Cr–N             | 165              | 22.8                                            | 52.2                                                          |
|                         | N–Iso            | 237              | 1.67                                            | 3.28                                                          |
| 3 <sup>rd</sup> Cooling | Cr–N             | 160              | –21.1                                           | –48.6                                                         |
|                         | N–Iso            | 242              | –1.05                                           | –2.04                                                         |



(c)

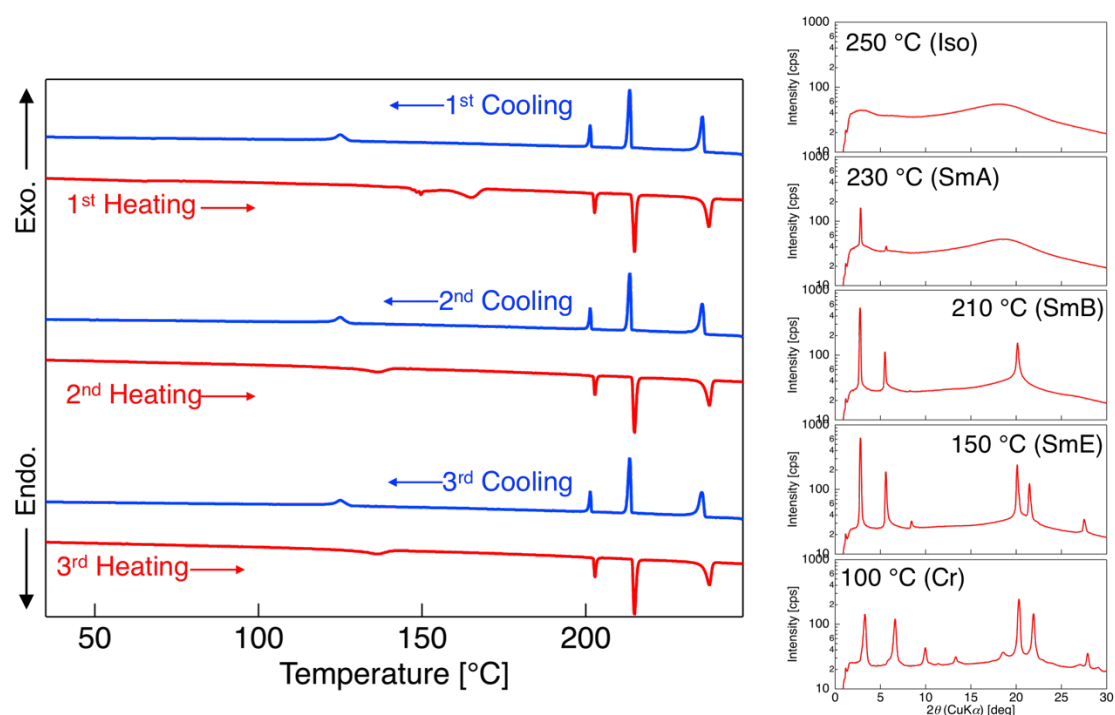

**Figure S23.** DSC thermogram of **2a** under N<sub>2</sub> atmosphere (scan rate: 5.0 °C min<sup>-1</sup>) and PXRD pattern.

**Table S14.** Phase transition behavior of **2a** determined by DSC

|                         | Phase transition                 | Temperature [°C] | Enthalpy ( $\Delta H$ ) [kJ mol <sup>-1</sup> ] | Entropy ( $\Delta S$ ) [J mol <sup>-1</sup> K <sup>-1</sup> ] |
|-------------------------|----------------------------------|------------------|-------------------------------------------------|---------------------------------------------------------------|
| 1 <sup>st</sup> Heating | Cr <sup>1</sup> –Cr <sup>2</sup> | 147              | 17.1                                            | 40.8                                                          |
|                         | Cr <sup>2</sup> –SmE             | 158              | –                                               | –                                                             |
|                         | SmE–SmB                          | 202              | 2.56                                            | 5.38                                                          |
|                         | SmB–SmA                          | 214              | 9.70                                            | 19.9                                                          |
|                         | SmA–Iso                          | 236              | 8.84                                            | 17.4                                                          |
| 1 <sup>st</sup> Cooling | Cr <sup>1</sup> –SmE             | 129              | –3.91                                           | –9.76                                                         |
|                         | SmE–SmB                          | 202              | –2.40                                           | –5.06                                                         |
|                         | SmB–SmA                          | 214              | –9.11                                           | –18.7                                                         |
|                         | SmA–Iso                          | 236              | –8.58                                           | –16.8                                                         |
| 2 <sup>nd</sup> Heating | Cr–SmE                           | 130              | 5.40                                            | 13.4                                                          |
|                         | SmE–SmB                          | 202              | 2.43                                            | 5.11                                                          |
|                         | SmB–SmA                          | 214              | 9.26                                            | 19.0                                                          |
|                         | SmA–Iso                          | 236              | 8.19                                            | 16.1                                                          |
| 2 <sup>nd</sup> Cooling | Cr–SmE                           | 127              | –3.94                                           | –9.85                                                         |
|                         | SmE–SmB                          | 202              | –2.39                                           | –5.03                                                         |
|                         | SmB–SmA                          | 214              | –8.76                                           | –18.0                                                         |
|                         | SmA–Iso                          | 236              | –7.93                                           | –15.6                                                         |
| 3 <sup>rd</sup> Heating | Cr–SmE                           | 130              | 5.92                                            | 14.7                                                          |
|                         | SmE–SmB                          | 202              | 2.38                                            | 5.01                                                          |
|                         | SmB–SmA                          | 214              | 9.06                                            | 18.6                                                          |
|                         | SmA–Iso                          | 236              | 8.05                                            | 15.8                                                          |
| 3 <sup>rd</sup> Cooling | Cr–SmE                           | 128              | –3.79                                           | –9.44                                                         |
|                         | SmE–SmB                          | 202              | –2.35                                           | –4.95                                                         |
|                         | SmB–SmA                          | 214              | –8.57                                           | –17.6                                                         |
|                         | SmA–Iso                          | 236              | –7.72                                           | –15.2                                                         |

(d)

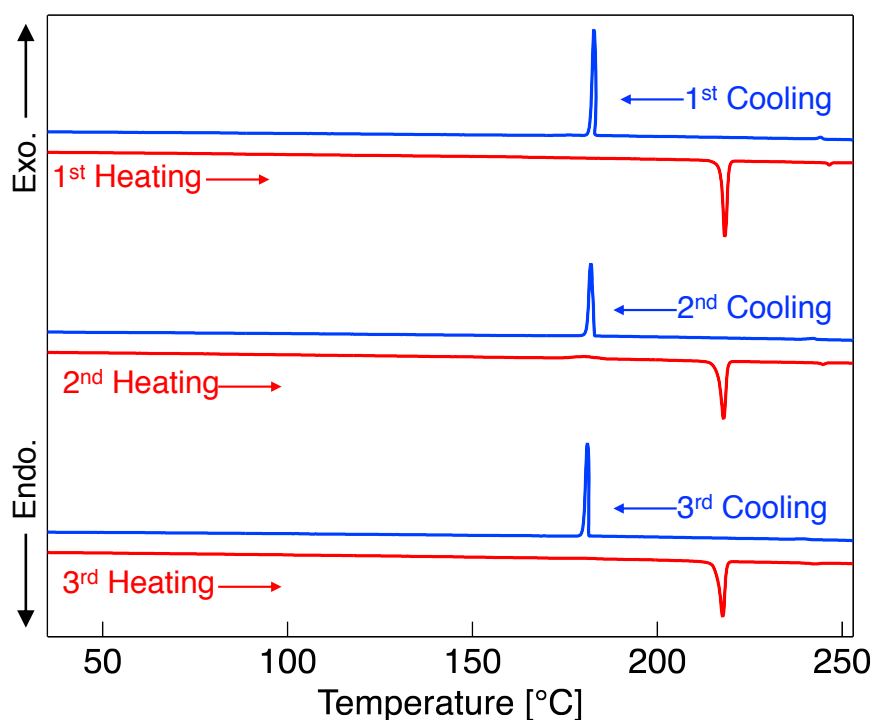

**Figure S24.** DSC thermogram of **2b** under N<sub>2</sub> atmosphere (scan rate: 5.0 °C min<sup>-1</sup>).

**Table S15.** Phase transition behavior of **2b** determined by DSC

|                         | Phase transition                 | Temperature [°C] | Enthalpy ( $\Delta H$ ) [kJ mol <sup>-1</sup> ] | Entropy ( $\Delta S$ ) [J mol <sup>-1</sup> K <sup>-1</sup> ] |
|-------------------------|----------------------------------|------------------|-------------------------------------------------|---------------------------------------------------------------|
| 1 <sup>st</sup> Heating | Cr–SmA                           | 217              | 40.9                                            | 83.5                                                          |
|                         | N–Iso                            | 246              | 0.96                                            | 1.86                                                          |
| 1 <sup>st</sup> Cooling | Cr–N                             | 183              | –27.0                                           | –59.3                                                         |
|                         | N–Iso                            | 245              | –0.92                                           | –1.78                                                         |
| 2 <sup>nd</sup> Heating | Cr <sup>1</sup> –Cr <sup>2</sup> | 175              | –4.64                                           | –10.4                                                         |
|                         | Cr <sup>2</sup> –N               | 216              | 39.3                                            | 80.4                                                          |
|                         | N–Iso                            | 244              | 1.00                                            | 1.93                                                          |
| 2 <sup>nd</sup> Cooling | Cr <sup>1</sup> –N               | 183              | –30.9                                           | –67.8                                                         |
|                         | N–Iso                            | 243              | –0.95                                           | –1.85                                                         |
| 3 <sup>rd</sup> Heating | Cr <sup>1</sup> –Cr <sup>2</sup> | 176              | –0.94                                           | –2.10                                                         |
|                         | Cr <sup>2</sup> –N               | 216              | 38.4                                            | 78.6                                                          |
|                         | N–Iso                            | 240              | 1.13                                            | 2.21                                                          |
| 3 <sup>rd</sup> Cooling | Cr <sup>1</sup> –N               | 181              | –26.4                                           | –58.2                                                         |
|                         | N–Iso                            | 241              | –0.82                                           | –1.60                                                         |

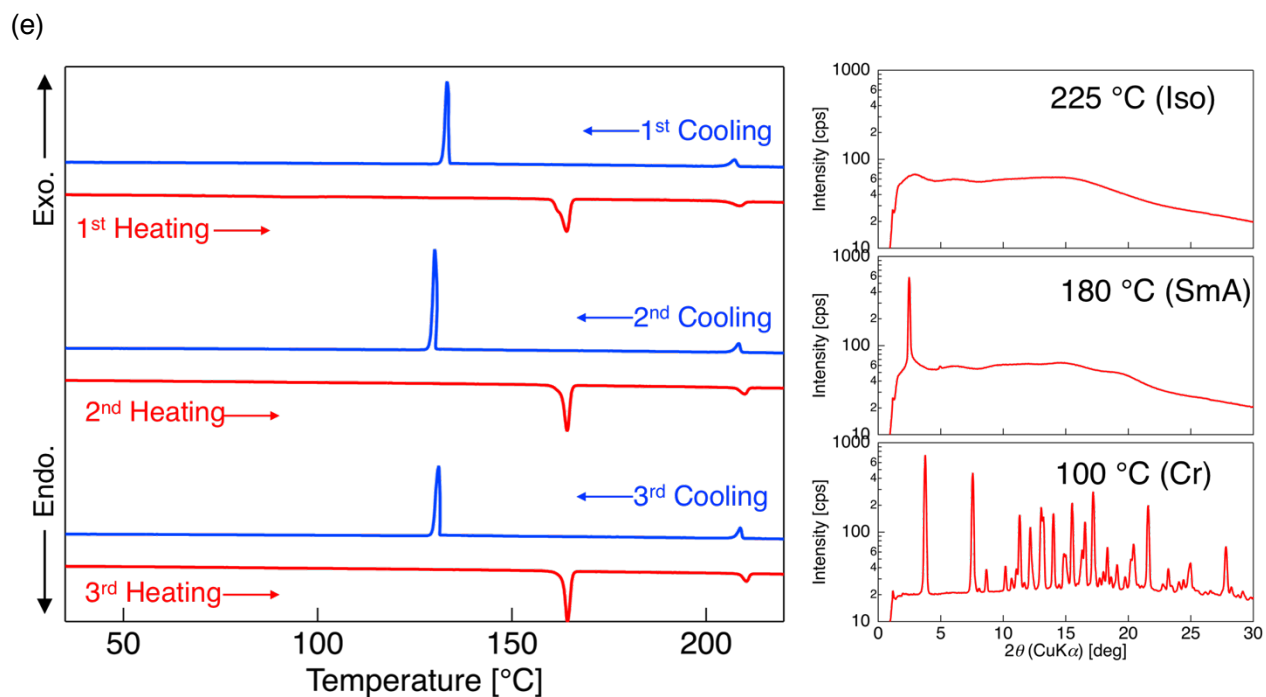

**Figure S25.** DSC thermogram of **2c** under N<sub>2</sub> atmosphere (scan rate: 5.0 °C min<sup>-1</sup>) and PXRD pattern.

**Table S16.** Phase transition behavior of **2c** determined by DSC

|                         | Phase transition  | Temperature [°C] | Enthalpy ( $\Delta H$ ) [kJ mol <sup>-1</sup> ] | Entropy ( $\Delta S$ ) [J mol <sup>-1</sup> K <sup>-1</sup> ] |
|-------------------------|-------------------|------------------|-------------------------------------------------|---------------------------------------------------------------|
| 1 <sup>st</sup> Heating | Cr–SmA<br>SmA–Iso | 161<br>206       | 28.4<br>4.83                                    | 65.5<br>10.1                                                  |
| 1 <sup>st</sup> Cooling | Cr–SmA<br>SmA–Iso | 134<br>208       | –23.8<br>–4.45                                  | –58.5<br>–9.25                                                |
| 2 <sup>nd</sup> Heating | Cr–SmA<br>SmA–Iso | 163<br>209       | 28.1<br>4.50                                    | 64.5<br>9.37                                                  |
| 2 <sup>nd</sup> Cooling | Cr–SmA<br>SmA–Iso | 131<br>209       | –22.6<br>–4.50                                  | –55.9<br>–9.33                                                |
| 3 <sup>rd</sup> Heating | Cr–SmA<br>SmA–Iso | 163<br>209       | 28.0<br>4.58                                    | 64.1<br>9.50                                                  |
| 3 <sup>rd</sup> Cooling | Cr–SmA<br>SmA–Iso | 131<br>209       | –22.8<br>–4.40                                  | –56.3<br>–9.12                                                |

#### 4.2.POM

Polarizing optical microscopy (POM) was carried out using an Olympus BX53 microscope (Tokyo, Japan) equipped with a cooling and heating stage (Linkam Scientific Instruments, 10002L; Surrey, UK).

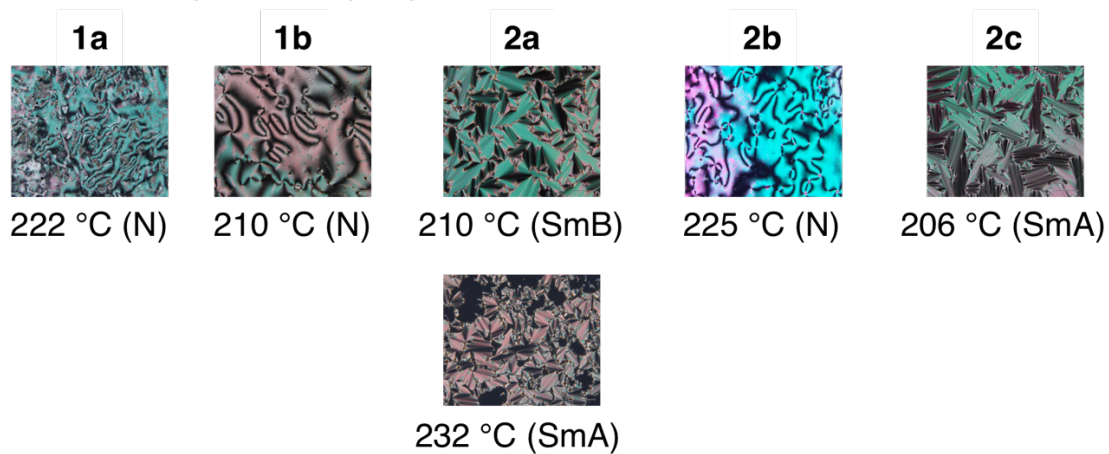

**Figure S26.** Microphotographs for optical texture images of LC phases for **1a**, **1b**, and **2a–c** observed by POM.

## 5. Photophysical Behavior

### 5.1. CH<sub>2</sub>Cl<sub>2</sub> solution

(a) **1a**

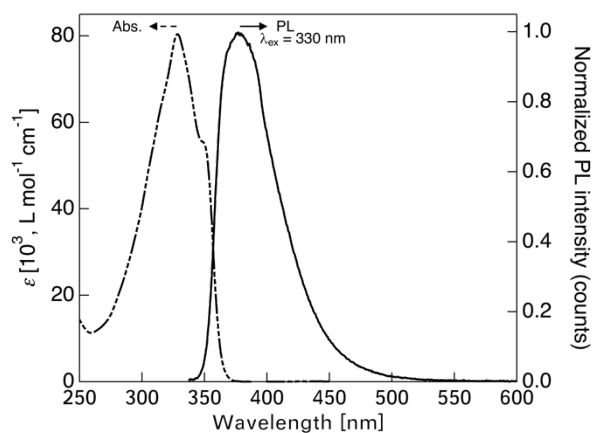

(b) **1b**

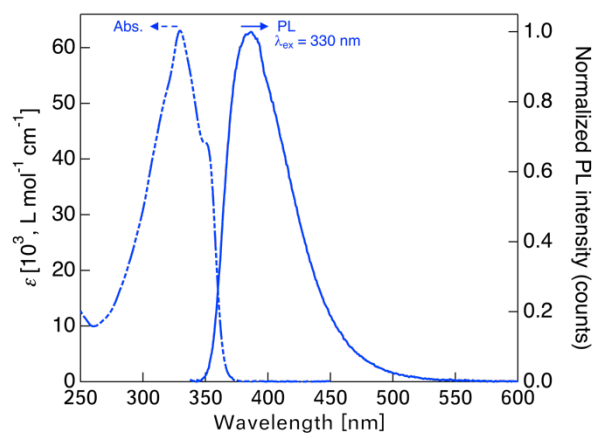

(c) **2a**

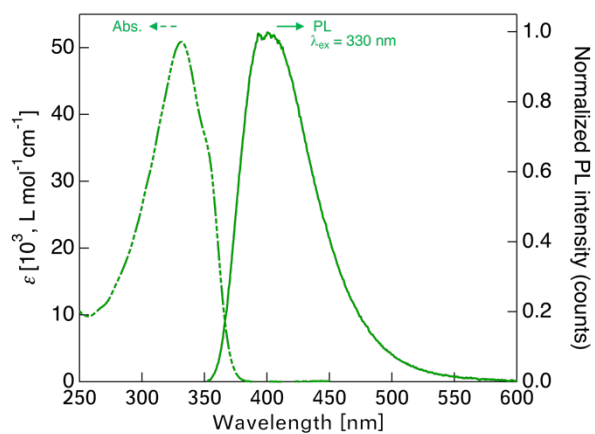

(d) **2b**

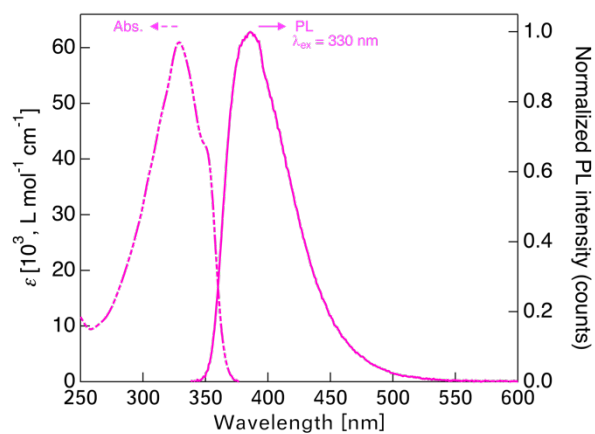

(e) **2c**

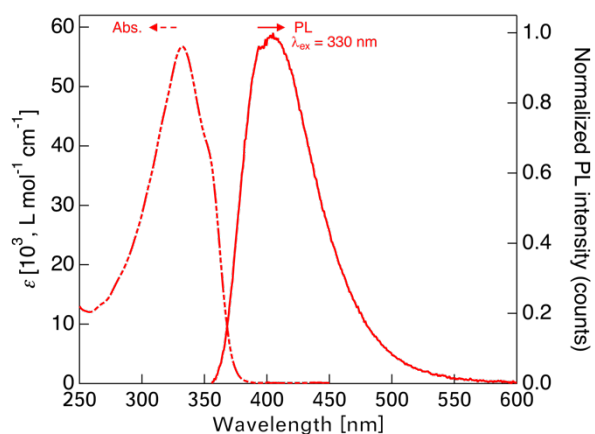

**Figure S27.** UV-vis absorption spectra (left axis) and photoluminescence spectra (right axis) for (a) **1a**, (b) **1b**, (c) **2a**, (d) **2b** and (e) **2c**. Concentration: UV-vis absorption measurement:  $1.0 \times 10^{-5}$  mol L<sup>-1</sup> and PL:  $1.0 \times 10^{-6}$  mol L<sup>-1</sup>.

## 5.2. Solvent Effect

### 5.2.1. Absorption and PL spectra of **1a** in various solvent

(a) Hexane

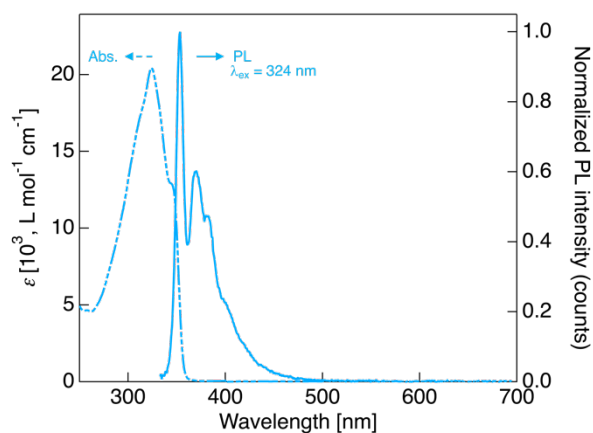

(b) CHCl<sub>3</sub>

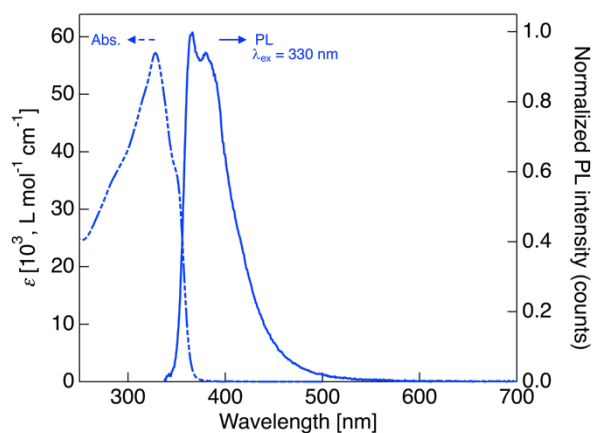

(c) DMF

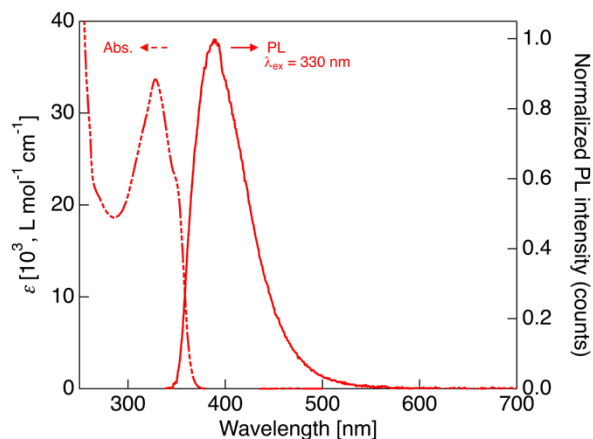

(d) MeCN

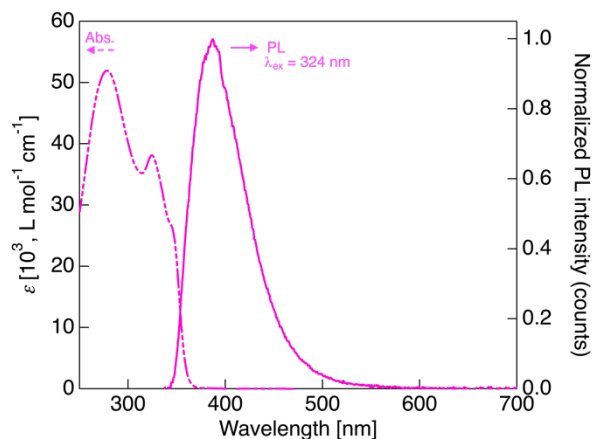

**Figure S28.** UV-vis absorption spectra (left axis) and photoluminescence spectra (right axis) of **1a** in (a) hexane, (b) CHCl<sub>3</sub>, (c) DMF and (d) MeCN. Concentration: UV-vis absorption measurement:  $1.0 \times 10^{-5}$  mol L<sup>-1</sup> and PL:  $1.0 \times 10^{-6}$  mol L<sup>-1</sup>.

**Table S17.** Polarizability and Stokes' shift obtained from general solvent effect.

|                                 | Relative permittivity | Refractive index | $\Delta f$ | $\nu_{\text{abs}}$ (cm <sup>-1</sup> ) | $\nu_{\text{PL}}$ (cm <sup>-1</sup> ) | $\Delta \nu$ (cm <sup>-1</sup> ) |
|---------------------------------|-----------------------|------------------|------------|----------------------------------------|---------------------------------------|----------------------------------|
| Hexane                          | 1.8799                | 1.3749           | -0.0013777 | 30864                                  | 28293                                 | 2571                             |
| CHCl <sub>3</sub>               | 4.806                 | 1.4429           | 0.14912754 | 30488                                  | 27299                                 | 3189                             |
| CH <sub>2</sub> Cl <sub>2</sub> | 8.93                  | 1.424            | 0.2171701  | 30488                                  | 26531                                 | 3957                             |
| DMF                             | 36.71                 | 1.428            | 0.27521461 | 30581                                  | 25656                                 | 4925                             |
| MeCN                            | 35.94                 | 1.344            | 0.30460935 | 30864                                  | 25856                                 | 5008                             |

### 5.2.2. Absorption and PL spectra of 2a in various solvent

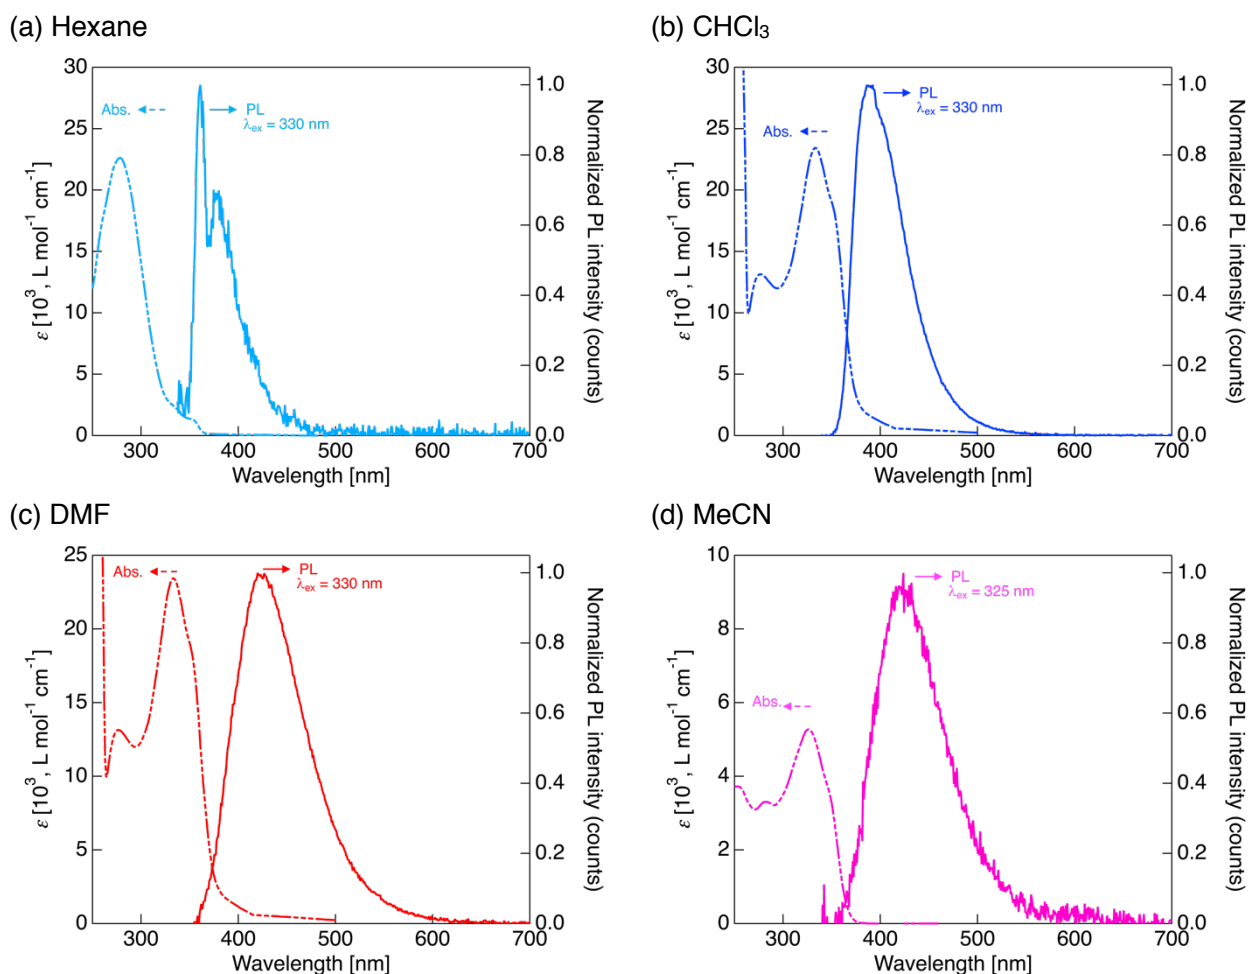

**Figure S29.** UV-vis absorption spectra (left axis) and photoluminescence spectra (right axis) of **2a** in (a) hexane, (b)  $\text{CHCl}_3$ , (c) DMF and (d) MeCN. Concentration: UV-vis absorption measurement:  $1.0 \times 10^{-5}$  mol  $\text{L}^{-1}$  and PL:  $1.0 \times 10^{-6}$  mol  $\text{L}^{-1}$ .

**Table S18.** Polarizability and Stokes' shift obtained from general solvent effect.

|                          | Relative permittivity | Refractive index | $\Delta f$ | $\nu_{\text{abs}} (\text{cm}^{-1})$ | $\nu_{\text{PL}} (\text{cm}^{-1})$ | $\Delta \nu (\text{cm}^{-1})$ |
|--------------------------|-----------------------|------------------|------------|-------------------------------------|------------------------------------|-------------------------------|
| Hexane                   | 1.8799                | 1.3749           | -0.0013777 | 29586                               | 27699                              | 1887                          |
| $\text{CHCl}_3$          | 4.806                 | 1.4429           | 0.14912754 | 30120                               | 25756                              | 4364                          |
| $\text{CH}_2\text{Cl}_2$ | 8.93                  | 1.424            | 0.2171701  | 30201                               | 24978                              | 5223                          |
| DMF                      | 36.71                 | 1.428            | 0.27521461 | 30030                               | 23641                              | 6389                          |
| MeCN                     | 35.94                 | 1.344            | 0.30460935 | 30675                               | 23599                              | 7076                          |

### 5.2.3. Lippert-Mataga plot

The Lippert-Mataga plot was constructed by using the relation

$$\nu_{\text{abs}} - \nu_{\text{PL}} = [2(\mu_e - \mu_g)^2 / hca^3] \Delta f + (\nu_{\text{abs}} - \nu_{\text{PL}})^{\circ} \quad (\text{Eq. 1})$$

where  $\nu_{\text{abs}} - \nu_{\text{PL}}$  is the Stokes' shift, the superscript "°" indicates the absence of solvent,  $\mu_g$  and  $\mu_e$  are dipole moments in the ground and the excited states, respectively,  $D$  ( $1D = 1.0 \times 10^{-18} \text{ cm}^{5/2} \text{ g}^{1/2} \text{ s}^{-1}$ );  $h$  is the Planck constant ( $h = 6.626 \times 10^{-27} \text{ erg s}$ );  $c$  is the rate of light in vacuum ( $c = 2.998 \times 10^{10} \text{ cm s}^{-1}$ ).  $a$  is Onsager cavity radius. The Onsager radius ( $a$ ) was estimated by DFT calculation using Gaussian 16 with M06-2X/6-31+G(d) level of theory:  $a = 6.01 \text{ \AA}$  for **1a** and  $6.20 \text{ \AA}$  for **2a**. The orientation polarizability  $\Delta f$  is defined as

$$\Delta f = [(\varepsilon - 1) / (2\varepsilon + 1)] - [(n^2 - 1) / (2n^2 + 1)] \quad (\text{Eq. 2})$$

where  $\varepsilon$  and  $n$  are solvent dielectric constant and refractive index, respectively.

(a) **1a**

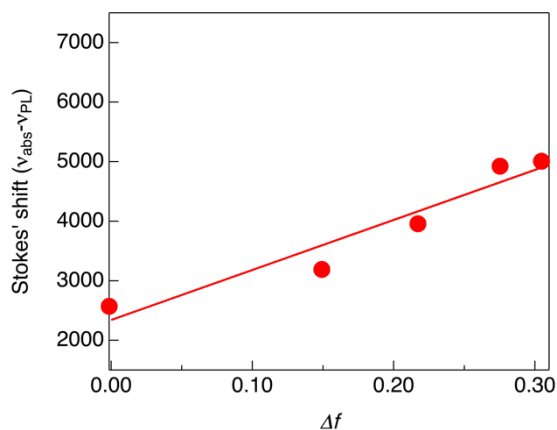

(b) **2a**

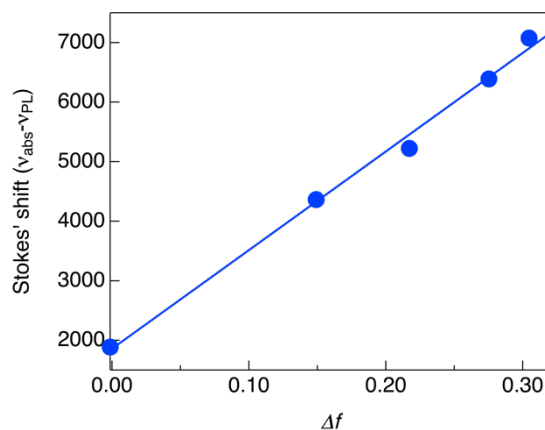

**Figure S30.** Lippert-Mataga plot for (a) **1a** and (b) **2a**.



### 5.3. Crystal

(a) **1a**

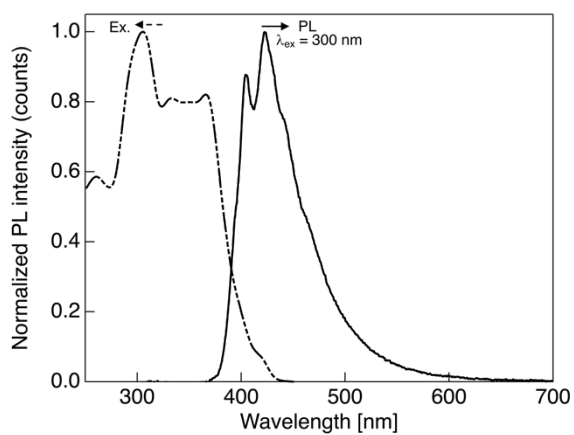

(b) **1b**

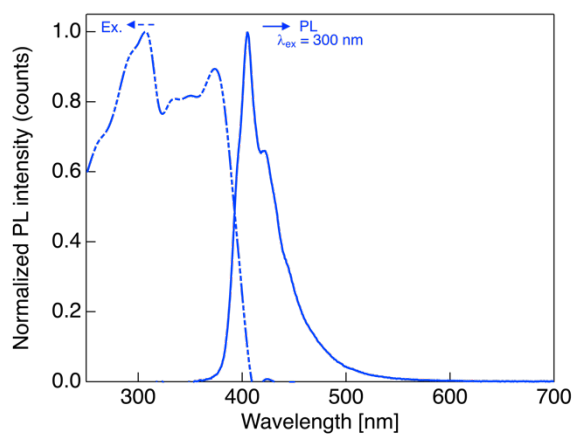

(c) **2a**

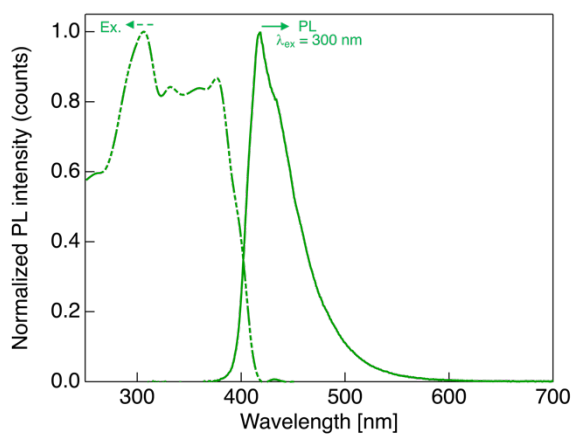

(d) **2b**

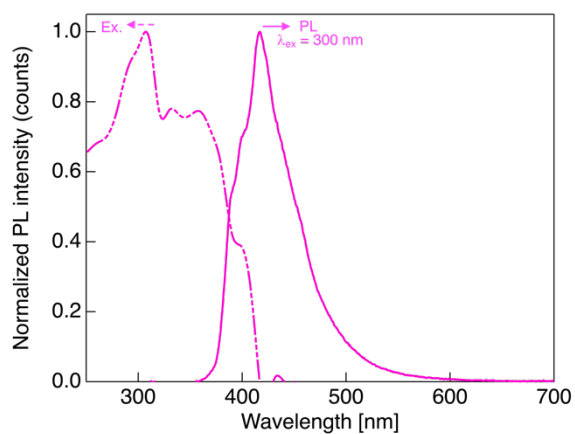

(e) **2c**

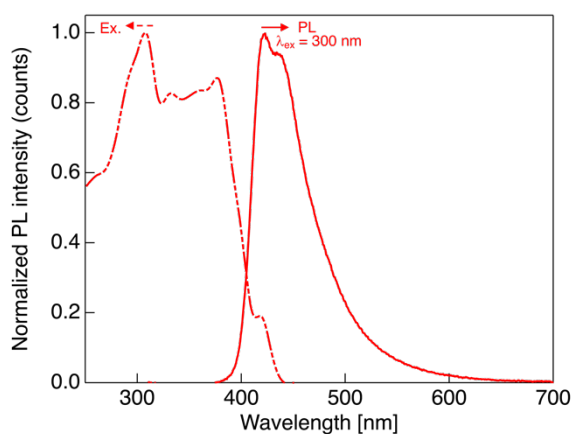

**Figure S31.** Excitation and photoluminescence spectra for (a) **1a**, (b) **1b**, (c) **2a**, (d) **2b** and (e) **2c** in crystalline samples. Excitation spectra were obtained for detection of PL at the maximum PL wavelength.
